# Supplementary material for: Partial Dominance in Branch-Price-and-Cut for the Basic Multicompartment Vehicle-Routing Problem
Source: Atypon-hosted journal article supplement (doi:10.1287/ijoc.2022.1255), 2022-12-01
Supplement: ijoc.2022.1255.sm1.pdf [file ijoc.2022.1255.sm1.pdf]

## E-Companion

In this Online Supplement, Section [EC.1](#) explains how a tight lower bound on the fleet size can be computed for the BMCVRP. Instance-by-instance results are listed in Section [EC.2](#).

### EC.1. Computation of a Fleet-Size Lower Bound

We comment on the computation of a tight lower bound  $F_{LB}^*$  for the minimal size of the vehicle fleet. For the case of identical compartments, i.e.,  $Q_1 = Q_2 = \dots = Q_m = Q/m$ , we can compute such an exact lower bound by solving a bin-packing or cutting-stock problem with bins of capacity  $Q/m$  and demands  $(d_i)_{i \in N}$ . The computed number  $z_{BP}$  of bins can then be divided by  $m$  and rounded up to the next integer, i.e.,

$$F_{LB}^* = \left\lceil \frac{z_{BP}}{m} \right\rceil.$$

For the case of compartments of different size, the following approach yields the exact lower bound. Let  $\bar{K} \subset K$  be an index set (not unique) of all different capacity values, i.e.,  $\{Q_k : k \in \bar{K}\} = \{Q_k : k \in K\}$  and  $Q_k \neq Q_{k'}$  for all  $k, k' \in \bar{K}$  with  $k \neq k'$ . Further, let  $h_k$  denote the frequency, i.e., the number of compartments of size  $Q_k$  for all  $k \in \bar{K}$ , i.e.,  $h_k = |\{k' \in K : Q_k = Q_{k'}\}|$ . For example,  $(Q_1, Q_2, \dots, Q_6) = (50, 50, 30, 20, 20, 20)$  has frequencies 2, 1, and 3 with  $k \in \bar{K} = \{1, 3, 4\}$ . Likewise, let  $\bar{N}$  be an index set (not unique) of all different demand values occurring with frequencies  $b_i$  for  $i \in \bar{N}$ .

The model that we suggest uses copies of the arc-flow formulation of the *cutting-stock problem* (CSP) ([Valerió de Carvalho 1998](#)), more specifically one copy for each compartment size given by  $k \in \bar{K}$ . Recall that the arc-flow formulation of the CSP uses a digraph in which each feasible pattern is in one-to-one correspondence to a source-to-sink path in the digraph. Hence, a source-to-sink flow through the digraph represents a solution to the CSP if sufficient flow passes through each subset of arcs that corresponds to a specific demand value  $b_i$  for all  $i \in \bar{N}$ .

Let  $D^k = (V^k, A^k)$  be the digraph for the index  $k \in \bar{K}$  with source vertex  $o^k$  and sink vertex  $d^k$ . The subset of arcs corresponding to the demand  $d_i$  for  $i \in \bar{N}$  is denoted by  $A^k(i)$ . There are non-negative integer flow variables  $\mathbf{x}^k = (x_{hj}^k)_{(h,j) \in A^k}$ . The non-negative integer

variables  $z^k$  for  $k \in \bar{K}$  indicate the total flow through the network  $D^k$ . Finally, the variable  $z$  provides the objective value. The model is:

$$F_{LB}^* = \min z \tag{EC.1a}$$

$$\text{subject to } h^k z \geq z^k \quad \forall k \in \bar{K} \tag{EC.1b}$$

$$\sum_{h: (h,i) \in A} x_{hi}^k - \sum_{j: (i,j) \in A} x_{ij}^k = \begin{cases} +z^k, & \text{if } i = o^k \\ -z^k, & \text{if } i = d^k \\ 0, & \text{otherwise} \end{cases} \quad \forall k \in \bar{K}, i \in \bar{N} \tag{EC.1c}$$

$$\sum_{k \in \bar{K}} \sum_{(h,j) \in A^k(i)} x_{hj}^k \geq b_i \quad \forall i \in \bar{N} \tag{EC.1d}$$

$$x_{hj}^k \geq 0 \text{ and integer} \quad \forall k \in \bar{K}, (h,j) \in A^k \tag{EC.1e}$$

$$z, z^k \geq 0 \quad \forall k \in \bar{K}. \tag{EC.1f}$$

The objective (EC.1a) minimizes the total number of packings covering the entire demand. Constraints (EC.1b) couple the objective value with the total flow through each network  $D^k$  for  $k \in \bar{K}$ . Due to the inequality, empty compartments without any assigned demand are possible. Hence, no additional loss arcs must be added to the network to allow empty compartments. Flow conservation and the coupling with the  $z^k$ -variables is accomplished via constraints (EC.1c). The demand covering constraints (EC.1d) differ from those of the original CSP because they refer to all networks  $D^k$  for  $k \in \bar{K}$  together. The domains of the variables are stated in (EC.1e) and (EC.1f).

EXAMPLE EC.1. Consider an instance of the BMCVRP in which vehicles have  $m = 2$  compartments of size  $\mathbf{Q} = (11, 7)$  so that the total vehicle capacity is  $Q = 18$ . The customers  $N = \{1, 2, \dots, 14\}$  have demands  $d_1 = \dots = d_4 = 8$  and  $d_5 = \dots = d_{14} = 4$ . The total demand is  $4 \cdot 8 + 10 \cdot 4 = 72$ .

The trivial lower bound of the fleet size is  $\lceil 72/18 \rceil = 4$ . The bin-packing bound, which is the exact lower bound on the number of vehicles for the capacitated VRP, is 5, because every feasible packing into bins of size  $Q = 18$  gives a loss of at least 2 units and any greedy

packing produces a solution with 5 bins. Finally, model (EC.1) provides the exact lower bound  $F_{LB}^* = 6$ . Note that four compartments of size  $Q_1 = 11$  are exclusively occupied with the first four demands  $d_1 = \dots = d_4 = 8$ . The other ten demands  $d_5 = \dots = d_{14} = 4$  either occupy a second compartment of size  $Q_2 = 7$  or two of them can be packed together into the first compartment of size  $Q_1 = 11$ . A possible solution therefore consists of four packings  $(8, 4)$  and two packings  $(4 + 4, 4)$ .  $\square$

Note that also refined pseudo-polynomial formulations for the CSP and bin-packing problem can be used (Delorme and Iori 2020, provide an overview). Since the computation of the lower bound is not time-critical in our application, we retain the simple model and hereby keep the description clear.

## EC.2. Detailed Computational Results

The entries in Table EC.1 have the following meaning:

No.: number of the instance;

$|V|$ : number of vertices;

$Q$ : total capacity;

$m$ : number of compartments;

$\mathbf{Q}$ : capacity vector;

opt: an asterisk \* indicates if the respective algorithm could solve the instance to proven optimality within 1 hour of computation time;

$UB$ : upper bound;

$LB_{\text{tree}}$ : lower bound when reaching the time limit of 1 hour;

$LB_{\text{LP}}$ : linear relaxation lower bound;

$LB_{\text{cut}}$ : linear relaxation lower bound of restricted master problem with cutting planes;

gap: percentage optimality gap  $100 \cdot (UB - LB_{\text{tree}}) / LB_{\text{tree}}$  at termination;

time: computation time in seconds;  $TL$  indicates that the time limit of 1 hour was reached;

#BaB: number of solved branch-and-bound nodes;

#CC: number of capacity cuts added;

#SRI: number of subset-row inequalities added.

Table EC.1: Detailed results for all instances solved by labeling with partial dominance.

| No. | $ V $ | $Q$ | $m$ | $Q$               | opt | $UB$  | $LB_{tree}$ | $LB_{LP}$ | $LB_{cut}$ | gap | time | #BaB | #CC | #SRI |
|-----|-------|-----|-----|-------------------|-----|-------|-------------|-----------|------------|-----|------|------|-----|------|
| 1   | 10    | 120 | 2   | (60, 60)          | *   | 408.3 | 408.3       | 344.1     | 408.3      | 0.0 | 0.5  | 1    | 300 | 6    |
| 2   | 10    | 120 | 2   | (40, 80)          | *   | 408.3 | 408.3       | 344.1     | 408.3      | 0.0 | 0.4  | 1    | 300 | 6    |
| 3   | 10    | 120 | 3   | (40, 40, 40)      | *   | 408.3 | 408.3       | 344.1     | 408.3      | 0.0 | 0.4  | 1    | 300 | 6    |
| 4   | 10    | 120 | 3   | (20, 40, 60)      | *   | 408.3 | 408.3       | 344.1     | 408.3      | 0.0 | 0.4  | 1    | 300 | 6    |
| 5   | 10    | 120 | 4   | (30, 30, 30, 30)  | *   | 408.3 | 408.3       | 358.4     | 408.3      | 0.0 | 0.4  | 1    | 300 | 6    |
| 6   | 10    | 120 | 4   | (10, 15, 30, 65)  | *   | 408.3 | 408.3       | 349.9     | 408.3      | 0.0 | 0.1  | 1    | 19  | 0    |
| 7   | 10    | 120 | 2   | (60, 60)          | *   | 361.3 | 361.3       | 331.6     | 361.3      | 0.0 | 0.1  | 1    | 20  | 0    |
| 8   | 10    | 120 | 2   | (40, 80)          | *   | 361.3 | 361.3       | 331.6     | 361.3      | 0.0 | 0.1  | 1    | 19  | 0    |
| 9   | 10    | 120 | 3   | (40, 40, 40)      | *   | 361.3 | 361.3       | 332.1     | 361.3      | 0.0 | <0.1 | 1    | 16  | 0    |
| 10  | 10    | 120 | 3   | (20, 40, 60)      | *   | 361.3 | 361.3       | 331.6     | 361.3      | 0.0 | 0.1  | 1    | 19  | 0    |
| 11  | 10    | 120 | 4   | (30, 30, 30, 30)  | *   | 361.3 | 361.3       | 342.9     | 361.3      | 0.0 | <0.1 | 1    | 13  | 0    |
| 12  | 10    | 120 | 4   | (10, 15, 30, 65)  | *   | 361.3 | 361.3       | 342.9     | 361.3      | 0.0 | 0.1  | 1    | 13  | 0    |
| 13  | 10    | 120 | 2   | (60, 60)          | *   | 300.0 | 300.0       | 300.0     | 300.0      | 0.0 | 0.1  | 1    | 0   | 0    |
| 14  | 10    | 120 | 2   | (40, 80)          | *   | 300.0 | 300.0       | 300.0     | 300.0      | 0.0 | 0.1  | 1    | 0   | 0    |
| 15  | 10    | 120 | 3   | (40, 40, 40)      | *   | 300.0 | 300.0       | 300.0     | 300.0      | 0.0 | <0.1 | 1    | 0   | 0    |
| 16  | 10    | 120 | 3   | (20, 40, 60)      | *   | 300.0 | 300.0       | 300.0     | 300.0      | 0.0 | <0.1 | 1    | 0   | 0    |
| 17  | 10    | 120 | 4   | (30, 30, 30, 30)  | *   | 300.0 | 300.0       | 300.0     | 300.0      | 0.0 | 0.1  | 1    | 0   | 0    |
| 18  | 10    | 120 | 4   | (10, 15, 30, 65)  | *   | 300.0 | 300.0       | 300.0     | 300.0      | 0.0 | 0.1  | 1    | 0   | 0    |
| 19  | 10    | 120 | 2   | (60, 60)          | *   | 299.2 | 299.2       | 292.1     | 299.2      | 0.0 | 0.1  | 1    | 22  | 0    |
| 20  | 10    | 120 | 2   | (40, 80)          | *   | 299.2 | 299.2       | 292.1     | 299.2      | 0.0 | 0.1  | 1    | 22  | 0    |
| 21  | 10    | 120 | 3   | (40, 40, 40)      | *   | 321.7 | 321.7       | 310.7     | 321.7      | 0.0 | 0.3  | 1    | 300 | 9    |
| 22  | 10    | 120 | 3   | (20, 40, 60)      | *   | 299.2 | 299.2       | 292.1     | 299.2      | 0.0 | 0.1  | 1    | 23  | 0    |
| 23  | 10    | 120 | 4   | (30, 30, 30, 30)  | *   | 306.8 | 306.8       | 299.8     | 306.8      | 0.0 | <0.1 | 1    | 21  | 0    |
| 24  | 10    | 120 | 4   | (10, 15, 30, 65)  | *   | 299.2 | 299.2       | 292.1     | 299.2      | 0.0 | 0.1  | 1    | 25  | 0    |
| 25  | 10    | 120 | 2   | (60, 60)          | *   | 374.3 | 374.3       | 364.5     | 374.3      | 0.0 | 0.1  | 1    | 17  | 0    |
| 26  | 10    | 120 | 2   | (40, 80)          | *   | 374.3 | 374.3       | 361.8     | 374.3      | 0.0 | 0.1  | 1    | 35  | 0    |
| 27  | 10    | 120 | 3   | (40, 40, 40)      | *   | 407.5 | 407.5       | 407.5     | 407.5      | 0.0 | <0.1 | 1    | 0   | 0    |
| 28  | 10    | 120 | 3   | (20, 40, 60)      | *   | 374.3 | 374.3       | 374.3     | 374.3      | 0.0 | <0.1 | 1    | 0   | 0    |
| 29  | 10    | 120 | 4   | (30, 30, 30, 30)  | *   | 385.8 | 385.8       | 385.8     | 385.8      | 0.0 | <0.1 | 1    | 0   | 0    |
| 30  | 10    | 120 | 4   | (10, 15, 30, 65)  | *   | 407.5 | 407.5       | 407.5     | 407.5      | 0.0 | <0.1 | 1    | 0   | 0    |
| 31  | 10    | 240 | 2   | (120, 120)        | *   | 336.4 | 336.4       | 336.4     | 336.4      | 0.0 | 0.1  | 1    | 0   | 0    |
| 32  | 10    | 240 | 2   | (80, 160)         | *   | 336.4 | 336.4       | 336.4     | 336.4      | 0.0 | 0.1  | 1    | 0   | 0    |
| 33  | 10    | 240 | 3   | (80, 80, 80)      | *   | 336.4 | 336.4       | 336.4     | 336.4      | 0.0 | 0.1  | 1    | 0   | 0    |
| 34  | 10    | 240 | 3   | (40, 80, 120)     | *   | 336.4 | 336.4       | 336.4     | 336.4      | 0.0 | 0.1  | 1    | 0   | 0    |
| 35  | 10    | 240 | 4   | (60, 60, 60, 60)  | *   | 336.4 | 336.4       | 336.4     | 336.4      | 0.0 | 0.1  | 1    | 0   | 0    |
| 36  | 10    | 240 | 4   | (20, 30, 60, 130) | *   | 336.4 | 336.4       | 336.4     | 336.4      | 0.0 | 1.0  | 1    | 0   | 0    |
| 37  | 10    | 240 | 2   | (120, 120)        | *   | 310.5 | 310.5       | 310.5     | 310.5      | 0.0 | 0.1  | 1    | 0   | 0    |
| 38  | 10    | 240 | 2   | (80, 160)         | *   | 310.5 | 310.5       | 310.5     | 310.5      | 0.0 | 0.1  | 1    | 0   | 0    |
| 39  | 10    | 240 | 3   | (80, 80, 80)      | *   | 310.5 | 310.5       | 310.5     | 310.5      | 0.0 | <0.1 | 1    | 0   | 0    |
| 40  | 10    | 240 | 3   | (40, 80, 120)     | *   | 310.5 | 310.5       | 310.5     | 310.5      | 0.0 | 0.1  | 1    | 0   | 0    |
| 41  | 10    | 240 | 4   | (60, 60, 60, 60)  | *   | 310.5 | 310.5       | 310.5     | 310.5      | 0.0 | <0.1 | 1    | 0   | 0    |
| 42  | 10    | 240 | 4   | (20, 30, 60, 130) | *   | 310.5 | 310.5       | 310.5     | 310.5      | 0.0 | 0.4  | 1    | 0   | 0    |
| 43  | 10    | 240 | 2   | (120, 120)        | *   | 279.9 | 279.9       | 279.9     | 279.9      | 0.0 | 0.1  | 1    | 0   | 0    |
| 44  | 10    | 240 | 2   | (80, 160)         | *   | 279.9 | 279.9       | 279.9     | 279.9      | 0.0 | 0.1  | 1    | 0   | 0    |
| 45  | 10    | 240 | 3   | (80, 80, 80)      | *   | 279.9 | 279.9       | 279.9     | 279.9      | 0.0 | <0.1 | 1    | 0   | 0    |
| 46  | 10    | 240 | 3   | (40, 80, 120)     | *   | 279.9 | 279.9       | 279.9     | 279.9      | 0.0 | 0.1  | 1    | 0   | 0    |
| 47  | 10    | 240 | 4   | (60, 60, 60, 60)  | *   | 279.9 | 279.9       | 279.9     | 279.9      | 0.0 | 0.1  | 1    | 0   | 0    |
| 48  | 10    | 240 | 4   | (20, 30, 60, 130) | *   | 279.9 | 279.9       | 279.9     | 279.9      | 0.0 | 0.4  | 1    | 0   | 0    |
| 49  | 10    | 240 | 2   | (120, 120)        | *   | 269.2 | 269.2       | 269.2     | 269.2      | 0.0 | 0.1  | 1    | 0   | 0    |
| 50  | 10    | 240 | 2   | (80, 160)         | *   | 269.2 | 269.2       | 269.2     | 269.2      | 0.0 | 0.1  | 1    | 0   | 0    |
| 51  | 10    | 240 | 3   | (80, 80, 80)      | *   | 269.2 | 269.2       | 269.2     | 269.2      | 0.0 | <0.1 | 1    | 0   | 0    |
| 52  | 10    | 240 | 3   | (40, 80, 120)     | *   | 269.2 | 269.2       | 269.2     | 269.2      | 0.0 | 0.1  | 1    | 0   | 0    |
| 53  | 10    | 240 | 4   | (60, 60, 60, 60)  | *   | 269.2 | 269.2       | 269.2     | 269.2      | 0.0 | <0.1 | 1    | 0   | 0    |
| 54  | 10    | 240 | 4   | (20, 30, 60, 130) | *   | 269.2 | 269.2       | 269.2     | 269.2      | 0.0 | 0.1  | 1    | 0   | 0    |
| 55  | 10    | 240 | 2   | (120, 120)        | *   | 257.8 | 257.8       | 257.8     | 257.8      | 0.0 | 0.1  | 1    | 0   | 0    |
| 56  | 10    | 240 | 2   | (80, 160)         | *   | 257.8 | 257.8       | 257.8     | 257.8      | 0.0 | 0.1  | 1    | 0   | 0    |
| 57  | 10    | 240 | 3   | (80, 80, 80)      | *   | 257.8 | 257.8       | 257.8     | 257.8      | 0.0 | <0.1 | 1    | 0   | 0    |
| 58  | 10    | 240 | 3   | (40, 80, 120)     | *   | 257.8 | 257.8       | 257.8     | 257.8      | 0.0 | 0.1  | 1    | 0   | 0    |
| 59  | 10    | 240 | 4   | (60, 60, 60, 60)  | *   | 257.8 | 257.8       | 257.8     | 257.8      | 0.0 | <0.1 | 1    | 0   | 0    |
| 60  | 10    | 240 | 4   | (20, 30, 60, 130) | *   | 257.8 | 257.8       | 257.8     | 257.8      | 0.0 | 0.3  | 1    | 0   | 0    |
| 61  | 20    | 120 | 2   | (60, 60)          | *   | 568.5 | 568.5       | 564.4     | 568.5      | 0.0 | 0.5  | 1    | 300 | 6    |
| 62  | 20    | 120 | 2   | (40, 80)          | *   | 568.5 | 568.5       | 564.4     | 568.5      | 0.0 | 0.5  | 1    | 300 | 6    |

Continued on next page

| No. | $ V $ | $Q$ | $m$ | $Q$               | opt | $UB$  | $LB_{tree}$ | $LB_{LP}$ | $LB_{cut}$ | gap | time   | #BaB | #CC | #SRI |
|-----|-------|-----|-----|-------------------|-----|-------|-------------|-----------|------------|-----|--------|------|-----|------|
| 63  | 20    | 120 | 3   | (40, 40, 40)      | *   | 654.9 | 654.9       | 653.1     | 654.9      | 0.0 | 0.5    | 1    | 300 | 2    |
| 64  | 20    | 120 | 3   | (20, 40, 60)      | *   | 613.6 | 613.6       | 609.7     | 613.6      | 0.0 | 0.6    | 1    | 300 | 9    |
| 65  | 20    | 120 | 4   | (30, 30, 30, 30)  | *   | 602.0 | 602.0       | 598.4     | 602.0      | 0.0 | 0.5    | 1    | 300 | 14   |
| 66  | 20    | 120 | 4   | (10, 15, 30, 65)  | *   | 621.6 | 621.6       | 621.2     | 621.6      | 0.0 | 0.9    | 1    | 300 | 10   |
| 67  | 20    | 120 | 2   | (60, 60)          | *   | 521.4 | 521.4       | 517.2     | 521.4      | 0.0 | 0.3    | 1    | 37  | 0    |
| 68  | 20    | 120 | 2   | (40, 80)          | *   | 521.4 | 521.4       | 517.2     | 521.4      | 0.0 | 0.3    | 1    | 34  | 0    |
| 69  | 20    | 120 | 3   | (40, 40, 40)      | *   | 538.2 | 538.2       | 536.2     | 538.2      | 0.0 | 0.5    | 1    | 120 | 0    |
| 70  | 20    | 120 | 3   | (20, 40, 60)      | *   | 538.2 | 538.2       | 528.7     | 538.2      | 0.0 | 1.8    | 1    | 300 | 18   |
| 71  | 20    | 120 | 4   | (30, 30, 30, 30)  | *   | 547.2 | 547.2       | 547.2     | 547.2      | 0.0 | 0.2    | 1    | 0   | 0    |
| 72  | 20    | 120 | 4   | (10, 15, 30, 65)  | *   | 538.2 | 538.2       | 538.2     | 538.2      | 0.0 | 0.9    | 1    | 0   | 0    |
| 73  | 20    | 120 | 2   | (60, 60)          | *   | 472.6 | 472.6       | 457.9     | 472.6      | 0.0 | 3.6    | 1    | 300 | 36   |
| 74  | 20    | 120 | 2   | (40, 80)          | *   | 472.6 | 472.6       | 470.3     | 472.6      | 0.0 | 2.5    | 1    | 300 | 10   |
| 75  | 20    | 120 | 3   | (40, 40, 40)      | *   | 481.2 | 481.2       | 475.1     | 481.2      | 0.0 | 6.1    | 1    | 300 | 10   |
| 76  | 20    | 120 | 3   | (20, 40, 60)      | *   | 472.6 | 472.6       | 470.3     | 472.6      | 0.0 | 16.0   | 1    | 300 | 10   |
| 77  | 20    | 120 | 4   | (30, 30, 30, 30)  | *   | 472.6 | 472.6       | 457.9     | 472.6      | 0.0 | 18.6   | 1    | 300 | 20   |
| 78  | 20    | 120 | 4   | (10, 15, 30, 65)  | *   | 472.6 | 472.6       | 470.3     | 472.6      | 0.0 | 60.8   | 1    | 300 | 10   |
| 79  | 20    | 120 | 2   | (60, 60)          | *   | 508.4 | 508.4       | 484.5     | 504.1      | 0.0 | 121.4  | 12   | 300 | 95   |
| 80  | 20    | 120 | 2   | (40, 80)          | *   | 508.4 | 508.4       | 493.0     | 504.2      | 0.0 | 80.9   | 7    | 300 | 113  |
| 81  | 20    | 120 | 3   | (40, 40, 40)      | *   | 528.3 | 528.3       | 518.2     | 528.2      | 0.0 | 8.6    | 2    | 300 | 77   |
| 82  | 20    | 120 | 3   | (20, 40, 60)      | *   | 508.4 | 508.4       | 493.0     | 508.4      | 0.0 | 2.7    | 1    | 160 | 0    |
| 83  | 20    | 120 | 4   | (30, 30, 30, 30)  | *   | 509.9 | 509.9       | 507.9     | 509.9      | 0.0 | 1.8    | 1    | 300 | 19   |
| 84  | 20    | 120 | 4   | (10, 15, 30, 65)  | *   | 528.3 | 528.3       | 518.2     | 527.9      | 0.0 | 63.0   | 2    | 300 | 75   |
| 85  | 20    | 120 | 2   | (60, 60)          | *   | 479.3 | 479.3       | 471.7     | 479.3      | 0.0 | 0.5    | 1    | 300 | 23   |
| 86  | 20    | 120 | 2   | (40, 80)          | *   | 479.3 | 479.3       | 471.7     | 479.3      | 0.0 | 0.5    | 1    | 300 | 20   |
| 87  | 20    | 120 | 3   | (40, 40, 40)      | *   | 487.3 | 487.3       | 481.1     | 487.3      | 0.0 | 0.6    | 1    | 300 | 9    |
| 88  | 20    | 120 | 3   | (20, 40, 60)      | *   | 479.3 | 479.3       | 473.6     | 479.3      | 0.0 | 0.5    | 1    | 61  | 0    |
| 89  | 20    | 120 | 4   | (30, 30, 30, 30)  | *   | 482.3 | 482.3       | 480.0     | 482.3      | 0.0 | 0.3    | 1    | 75  | 0    |
| 90  | 20    | 120 | 4   | (10, 15, 30, 65)  | *   | 493.6 | 493.6       | 491.2     | 493.6      | 0.0 | 7.5    | 1    | 300 | 22   |
| 91  | 20    | 240 | 2   | (120, 120)        | *   | 440.8 | 440.8       | 437.0     | 440.8      | 0.0 | 0.5    | 1    | 45  | 0    |
| 92  | 20    | 240 | 2   | (80, 160)         | *   | 440.8 | 440.8       | 437.0     | 440.8      | 0.0 | 0.5    | 1    | 52  | 0    |
| 93  | 20    | 240 | 3   | (80, 80, 80)      | *   | 440.8 | 440.8       | 437.0     | 440.8      | 0.0 | 5.2    | 1    | 43  | 0    |
| 94  | 20    | 240 | 3   | (40, 80, 120)     | *   | 440.8 | 440.8       | 437.0     | 440.8      | 0.0 | 7.8    | 1    | 43  | 0    |
| 95  | 20    | 240 | 4   | (60, 60, 60, 60)  | *   | 440.8 | 440.8       | 438.1     | 440.8      | 0.0 | 21.4   | 1    | 41  | 0    |
| 96  | 20    | 240 | 4   | (20, 30, 60, 130) | *   | 440.8 | 440.8       | 437.9     | 440.8      | 0.0 | 166.6  | 1    | 44  | 0    |
| 97  | 20    | 240 | 2   | (120, 120)        | *   | 463.6 | 463.6       | 450.9     | 463.6      | 0.0 | 1.3    | 1    | 300 | 0    |
| 98  | 20    | 240 | 2   | (80, 160)         | *   | 463.6 | 463.6       | 450.9     | 463.6      | 0.0 | 1.0    | 1    | 196 | 0    |
| 99  | 20    | 240 | 3   | (80, 80, 80)      | *   | 463.6 | 463.6       | 451.1     | 463.6      | 0.0 | 5.9    | 1    | 300 | 10   |
| 100 | 20    | 240 | 3   | (40, 80, 120)     | *   | 463.6 | 463.6       | 450.9     | 463.6      | 0.0 | 8.3    | 1    | 156 | 0    |
| 101 | 20    | 240 | 4   | (60, 60, 60, 60)  | *   | 463.6 | 463.6       | 451.7     | 463.6      | 0.0 | 12.7   | 1    | 247 | 0    |
| 102 | 20    | 240 | 4   | (20, 30, 60, 130) | *   | 463.6 | 463.6       | 451.1     | 463.6      | 0.0 | 154.9  | 1    | 214 | 0    |
| 103 | 20    | 240 | 2   | (120, 120)        | *   | 451.6 | 451.6       | 418.4     | 451.6      | 0.0 | 17.6   | 1    | 300 | 79   |
| 104 | 20    | 240 | 2   | (80, 160)         | *   | 451.6 | 451.6       | 418.4     | 451.6      | 0.0 | 3.0    | 1    | 300 | 32   |
| 105 | 20    | 240 | 3   | (80, 80, 80)      | *   | 451.6 | 451.6       | 418.4     | 451.6      | 0.0 | 14.1   | 1    | 300 | 9    |
| 106 | 20    | 240 | 3   | (40, 80, 120)     | *   | 451.6 | 451.6       | 418.4     | 451.6      | 0.0 | 33.5   | 1    | 300 | 30   |
| 107 | 20    | 240 | 4   | (60, 60, 60, 60)  | *   | 451.6 | 451.6       | 424.4     | 451.6      | 0.0 | 38.1   | 1    | 300 | 8    |
| 108 | 20    | 240 | 4   | (20, 30, 60, 130) | *   | 451.6 | 451.6       | 421.3     | 451.6      | 0.0 | 606.0  | 1    | 300 | 16   |
| 109 | 20    | 240 | 2   | (120, 120)        | *   | 457.4 | 457.4       | 446.8     | 457.4      | 0.0 | 0.9    | 1    | 104 | 0    |
| 110 | 20    | 240 | 2   | (80, 160)         | *   | 457.4 | 457.4       | 446.8     | 457.4      | 0.0 | 0.9    | 1    | 115 | 0    |
| 111 | 20    | 240 | 3   | (80, 80, 80)      | *   | 457.4 | 457.4       | 446.8     | 457.4      | 0.0 | 9.2    | 1    | 111 | 0    |
| 112 | 20    | 240 | 3   | (40, 80, 120)     | *   | 457.4 | 457.4       | 446.8     | 457.4      | 0.0 | 13.8   | 1    | 111 | 0    |
| 113 | 20    | 240 | 4   | (60, 60, 60, 60)  | *   | 457.4 | 457.4       | 446.8     | 457.4      | 0.0 | 40.5   | 1    | 157 | 0    |
| 114 | 20    | 240 | 4   | (20, 30, 60, 130) | *   | 457.4 | 457.4       | 446.8     | 457.4      | 0.0 | 198.7  | 1    | 112 | 0    |
| 115 | 20    | 240 | 2   | (120, 120)        | *   | 451.0 | 451.0       | 425.3     | 451.0      | 0.0 | 1.5    | 1    | 122 | 0    |
| 116 | 20    | 240 | 2   | (80, 160)         | *   | 451.0 | 451.0       | 425.3     | 451.0      | 0.0 | 1.6    | 1    | 134 | 0    |
| 117 | 20    | 240 | 3   | (80, 80, 80)      | *   | 451.0 | 451.0       | 425.3     | 451.0      | 0.0 | 40.0   | 1    | 177 | 0    |
| 118 | 20    | 240 | 3   | (40, 80, 120)     | *   | 451.0 | 451.0       | 425.3     | 451.0      | 0.0 | 53.6   | 1    | 69  | 0    |
| 119 | 20    | 240 | 4   | (60, 60, 60, 60)  | *   | 451.0 | 451.0       | 426.5     | 451.0      | 0.0 | 260.5  | 1    | 60  | 0    |
| 120 | 20    | 240 | 4   | (20, 30, 60, 130) | *   | 451.0 | 451.0       | 426.8     | 451.0      | 0.0 | 1900.2 | 1    | 61  | 0    |
| 121 | 30    | 120 | 2   | (60, 60)          | *   | 911.8 | 911.8       | 874.1     | 911.8      | 0.0 | 2.0    | 1    | 300 | 29   |
| 122 | 30    | 120 | 2   | (40, 80)          | *   | 911.8 | 911.8       | 867.6     | 911.8      | 0.0 | 2.4    | 1    | 300 | 40   |
| 123 | 30    | 120 | 3   | (40, 40, 40)      | *   | 926.6 | 926.6       | 897.5     | 921.9      | 0.0 | 108.6  | 9    | 300 | 141  |
| 124 | 30    | 120 | 3   | (20, 40, 60)      | *   | 911.8 | 911.8       | 877.6     | 911.8      | 0.0 | 5.6    | 1    | 300 | 28   |
| 125 | 30    | 120 | 4   | (30, 30, 30, 30)  | *   | 929.0 | 928.9       | 896.3     | 926.7      | 0.0 | 21.7   | 2    | 300 | 122  |
| 126 | 30    | 120 | 4   | (10, 15, 30, 65)  | *   | 942.8 | 942.8       | 919.9     | 942.8      | 0.0 | 12.8   | 1    | 300 | 63   |
| 127 | 30    | 120 | 2   | (60, 60)          | *   | 690.5 | 690.5       | 668.3     | 690.5      | 0.0 | 1.4    | 1    | 300 | 48   |

*Continued on next page*

| No. | $ V $ | $Q$ | $m$ | $Q$               | opt | $UB$  | $LB_{tree}$ | $LB_{LP}$ | $LB_{cut}$ | gap | time   | #BaB | #CC | #SRI |
|-----|-------|-----|-----|-------------------|-----|-------|-------------|-----------|------------|-----|--------|------|-----|------|
| 128 | 30    | 120 | 2   | (40, 80)          | *   | 690.5 | 690.5       | 656.2     | 690.5      | 0.0 | 1.4    | 1    | 300 | 49   |
| 129 | 30    | 120 | 3   | (40, 40, 40)      | *   | 702.3 | 702.3       | 698.9     | 702.3      | 0.0 | 0.8    | 1    | 132 | 0    |
| 130 | 30    | 120 | 3   | (20, 40, 60)      | *   | 690.5 | 690.5       | 672.5     | 690.5      | 0.0 | 2.4    | 1    | 300 | 31   |
| 131 | 30    | 120 | 4   | (30, 30, 30, 30)  | *   | 702.3 | 702.3       | 702.3     | 702.3      | 0.0 | 0.4    | 1    | 0   | 0    |
| 132 | 30    | 120 | 4   | (10, 15, 30, 65)  | *   | 739.3 | 739.3       | 719.1     | 739.3      | 0.0 | 12.2   | 1    | 300 | 69   |
| 133 | 30    | 120 | 2   | (60, 60)          | *   | 626.2 | 626.2       | 618.7     | 626.2      | 0.0 | 0.7    | 1    | 300 | 10   |
| 134 | 30    | 120 | 2   | (40, 80)          | *   | 624.4 | 624.4       | 616.0     | 624.4      | 0.0 | 0.7    | 1    | 300 | 0    |
| 135 | 30    | 120 | 3   | (40, 40, 40)      | *   | 643.2 | 643.2       | 636.6     | 643.2      | 0.0 | 2.8    | 1    | 300 | 30   |
| 136 | 30    | 120 | 3   | (20, 40, 60)      | *   | 626.2 | 626.2       | 618.7     | 626.2      | 0.0 | 1.8    | 1    | 263 | 0    |
| 137 | 30    | 120 | 4   | (30, 30, 30, 30)  | *   | 626.2 | 626.2       | 625.4     | 626.2      | 0.0 | 0.8    | 1    | 143 | 0    |
| 138 | 30    | 120 | 4   | (10, 15, 30, 65)  | *   | 626.2 | 626.2       | 626.2     | 626.2      | 0.0 | 6.1    | 1    | 0   | 0    |
| 139 | 30    | 120 | 2   | (60, 60)          | *   | 646.1 | 646.1       | 634.4     | 644.1      | 0.0 | 16.0   | 2    | 300 | 73   |
| 140 | 30    | 120 | 2   | (40, 80)          | *   | 643.0 | 643.0       | 629.5     | 643.0      | 0.0 | 1.8    | 1    | 300 | 0    |
| 141 | 30    | 120 | 3   | (40, 40, 40)      | *   | 650.5 | 650.5       | 643.3     | 650.0      | 0.0 | 29.4   | 2    | 300 | 37   |
| 142 | 30    | 120 | 3   | (20, 40, 60)      | *   | 650.5 | 650.5       | 639.0     | 645.3      | 0.0 | 141.9  | 3    | 300 | 52   |
| 143 | 30    | 120 | 4   | (30, 30, 30, 30)  | *   | 650.5 | 650.5       | 644.6     | 650.5      | 0.0 | 11.5   | 1    | 300 | 10   |
| 144 | 30    | 120 | 4   | (10, 15, 30, 65)  | *   | 650.5 | 650.5       | 639.7     | 650.5      | 0.0 | 196.0  | 1    | 300 | 50   |
| 145 | 30    | 120 | 2   | (60, 60)          | *   | 638.7 | 638.7       | 628.6     | 638.7      | 0.0 | 5.5    | 1    | 300 | 30   |
| 146 | 30    | 120 | 2   | (40, 80)          | *   | 638.7 | 638.7       | 628.6     | 638.7      | 0.0 | 5.3    | 1    | 300 | 30   |
| 147 | 30    | 120 | 3   | (40, 40, 40)      | *   | 656.9 | 656.9       | 640.0     | 652.2      | 0.0 | 741.3  | 4    | 300 | 246  |
| 148 | 30    | 120 | 3   | (20, 40, 60)      | *   | 638.7 | 638.7       | 628.6     | 638.7      | 0.0 | 45.4   | 1    | 300 | 20   |
| 149 | 30    | 120 | 4   | (30, 30, 30, 30)  | *   | 638.7 | 638.7       | 636.3     | 638.7      | 0.0 | 29.6   | 1    | 300 | 10   |
| 150 | 30    | 120 | 4   | (10, 15, 30, 65)  | *   | 656.9 | 655.6       | 640.0     | 652.6      | 0.2 | TL     | 2    | 300 | 215  |
| 151 | 30    | 240 | 2   | (120, 120)        | *   | 582.7 | 582.7       | 543.3     | 582.7      | 0.0 | 13.4   | 1    | 300 | 25   |
| 152 | 30    | 240 | 2   | (80, 160)         | *   | 582.7 | 582.7       | 543.3     | 582.7      | 0.0 | 8.7    | 1    | 300 | 10   |
| 153 | 30    | 240 | 3   | (80, 80, 80)      | *   | 582.7 | 582.7       | 543.4     | 582.7      | 0.0 | 99.3   | 1    | 300 | 10   |
| 154 | 30    | 240 | 3   | (40, 80, 120)     | *   | 582.7 | 582.7       | 543.3     | 582.7      | 0.0 | 212.8  | 1    | 300 | 26   |
| 155 | 30    | 240 | 4   | (60, 60, 60, 60)  | *   | 582.7 | 582.7       | 543.7     | 582.7      | 0.0 | 785.7  | 1    | 300 | 23   |
| 156 | 30    | 240 | 4   | (20, 30, 60, 130) | *   | 582.7 | 582.7       | 543.4     | 582.7      | 0.0 | 1727.4 | 1    | 300 | 16   |
| 157 | 30    | 240 | 2   | (120, 120)        | *   | 511.1 | 511.1       | 491.1     | 511.1      | 0.0 | 366.1  | 1    | 300 | 53   |
| 158 | 30    | 240 | 2   | (80, 160)         | *   | 511.1 | 511.1       | 491.1     | 511.1      | 0.0 | 314.2  | 1    | 300 | 30   |
| 159 | 30    | 240 | 3   | (80, 80, 80)      | *   | 511.1 | 511.1       | 491.1     | 511.1      | 0.0 | 2599.1 | 1    | 300 | 30   |
| 160 | 30    | 240 | 3   | (40, 80, 120)     | *   |       | 501.3       | 491.1     | 501.3      |     | TL     | 1    | 300 | 30   |
| 161 | 30    | 240 | 4   | (60, 60, 60, 60)  | *   |       | 491.2       | 491.2     | 491.2      |     | TL     | 1    | 113 | 0    |
| 162 | 30    | 240 | 4   | (20, 30, 60, 130) | *   |       |             |           |            |     | TL     | 0    | 0   | 0    |
| 163 | 30    | 240 | 2   | (120, 120)        | *   | 467.7 | 467.7       | 458.8     | 467.7      | 0.0 | 2.9    | 1    | 198 | 0    |
| 164 | 30    | 240 | 2   | (80, 160)         | *   | 467.7 | 467.7       | 458.8     | 467.7      | 0.0 | 4.8    | 1    | 191 | 0    |
| 165 | 30    | 240 | 3   | (80, 80, 80)      | *   | 467.7 | 467.7       | 458.8     | 467.7      | 0.0 | 73.4   | 1    | 203 | 0    |
| 166 | 30    | 240 | 3   | (40, 80, 120)     | *   | 467.7 | 467.7       | 458.8     | 467.7      | 0.0 | 112.4  | 1    | 185 | 0    |
| 167 | 30    | 240 | 4   | (60, 60, 60, 60)  | *   | 467.7 | 467.7       | 458.8     | 467.7      | 0.0 | 760.6  | 1    | 181 | 0    |
| 168 | 30    | 240 | 4   | (20, 30, 60, 130) | *   | 467.7 | 467.7       | 458.8     | 467.7      | 0.0 | 2061.3 | 1    | 204 | 0    |
| 169 | 30    | 240 | 2   | (120, 120)        | *   | 541.7 | 541.7       | 513.2     | 541.7      | 0.0 | 38.0   | 1    | 300 | 10   |
| 170 | 30    | 240 | 2   | (80, 160)         | *   | 541.7 | 541.7       | 513.2     | 541.7      | 0.0 | 35.5   | 1    | 275 | 0    |
| 171 | 30    | 240 | 3   | (80, 80, 80)      | *   | 541.7 | 541.7       | 513.2     | 541.7      | 0.0 | 835.7  | 1    | 300 | 20   |
| 172 | 30    | 240 | 3   | (40, 80, 120)     | *   | 541.7 | 541.7       | 513.2     | 541.7      | 0.0 | 1305.1 | 1    | 300 | 10   |
| 173 | 30    | 240 | 4   | (60, 60, 60, 60)  | *   |       | 513.2       | 513.2     | 513.2      |     | TL     | 1    | 0   | 0    |
| 174 | 30    | 240 | 4   | (20, 30, 60, 130) | *   |       |             |           |            |     | TL     | 0    | 0   | 0    |
| 175 | 30    | 240 | 2   | (120, 120)        | *   | 623.4 | 623.4       | 593.7     | 623.4      | 0.0 | 15.6   | 1    | 300 | 50   |
| 176 | 30    | 240 | 2   | (80, 160)         | *   | 623.4 | 623.4       | 593.7     | 623.4      | 0.0 | 18.0   | 1    | 300 | 57   |
| 177 | 30    | 240 | 3   | (80, 80, 80)      | *   | 623.4 | 623.4       | 593.8     | 623.4      | 0.0 | 235.3  | 1    | 300 | 50   |
| 178 | 30    | 240 | 3   | (40, 80, 120)     | *   | 623.4 | 623.4       | 593.7     | 623.4      | 0.0 | 319.9  | 1    | 300 | 51   |
| 179 | 30    | 240 | 4   | (60, 60, 60, 60)  | *   | 630.3 | 630.3       | 594.8     | 630.3      | 0.0 | 3400.3 | 1    | 300 | 155  |
| 180 | 30    | 240 | 4   | (20, 30, 60, 130) | *   |       | 619.9       | 594.7     | 619.9      |     | TL     | 1    | 300 | 30   |
| 181 | 40    | 120 | 2   | (60, 60)          | *   | 761.7 | 761.7       | 738.5     | 761.7      | 0.0 | 2.1    | 1    | 300 | 30   |
| 182 | 40    | 120 | 2   | (40, 80)          | *   | 761.7 | 761.7       | 738.5     | 761.7      | 0.0 | 2.3    | 1    | 300 | 31   |
| 183 | 40    | 120 | 3   | (40, 40, 40)      | *   | 782.0 | 781.9       | 748.8     | 778.8      | 0.0 | 242.0  | 6    | 300 | 186  |
| 184 | 40    | 120 | 3   | (20, 40, 60)      | *   | 773.0 | 773.0       | 740.9     | 773.0      | 0.0 | 21.4   | 1    | 300 | 73   |
| 185 | 40    | 120 | 4   | (30, 30, 30, 30)  | *   | 782.7 | 782.7       | 762.4     | 782.7      | 0.0 | 32.1   | 1    | 300 | 124  |
| 186 | 40    | 120 | 4   | (10, 15, 30, 65)  | *   | 782.7 | 782.7       | 765.9     | 782.7      | 0.0 | 88.0   | 1    | 300 | 76   |
| 187 | 40    | 120 | 2   | (60, 60)          | *   | 847.9 | 847.9       | 832.5     | 847.9      | 0.0 | 8.1    | 1    | 300 | 82   |
| 188 | 40    | 120 | 2   | (40, 80)          | *   | 847.9 | 847.9       | 826.8     | 846.8      | 0.0 | 24.1   | 2    | 300 | 115  |
| 189 | 40    | 120 | 3   | (40, 40, 40)      | *   | 874.6 | 874.6       | 864.2     | 868.5      | 0.0 | 111.9  | 5    | 300 | 121  |
| 190 | 40    | 120 | 3   | (20, 40, 60)      | *   | 874.0 | 873.9       | 860.6     | 865.3      | 0.0 | 916.2  | 16   | 300 | 226  |
| 191 | 40    | 120 | 4   | (30, 30, 30, 30)  | *   | 878.8 | 878.8       | 851.0     | 869.5      | 0.0 | 3070.7 | 34   | 300 | 297  |
| 192 | 40    | 120 | 4   | (10, 15, 30, 65)  | *   | 887.6 | 887.6       | 874.0     | 882.7      | 0.0 | 467.4  | 4    | 300 | 131  |

Continued on next page

| No. | $ V $ | $Q$ | $m$ | $Q$               | opt | $UB$   | $LB_{tree}$ | $LB_{LP}$ | $LB_{cut}$ | gap | time   | #BaB | #CC | #SRI |
|-----|-------|-----|-----|-------------------|-----|--------|-------------|-----------|------------|-----|--------|------|-----|------|
| 193 | 40    | 120 | 2   | (60, 60)          | *   | 749.0  | 749.0       | 723.5     | 749.0      | 0.0 | 5.8    | 1    | 300 | 106  |
| 194 | 40    | 120 | 2   | (40, 80)          | *   | 748.2  | 748.2       | 722.5     | 748.2      | 0.0 | 12.2   | 2    | 300 | 82   |
| 195 | 40    | 120 | 3   | (40, 40, 40)      | *   | 767.0  | 767.0       | 741.5     | 767.0      | 0.0 | 16.0   | 1    | 300 | 101  |
| 196 | 40    | 120 | 3   | (20, 40, 60)      | *   | 749.0  | 749.0       | 723.5     | 749.0      | 0.0 | 19.0   | 1    | 300 | 70   |
| 197 | 40    | 120 | 4   | (30, 30, 30, 30)  | *   | 790.0  | 789.9       | 773.6     | 787.6      | 0.0 | 37.3   | 3    | 300 | 97   |
| 198 | 40    | 120 | 4   | (10, 15, 30, 65)  | *   | 787.2  | 787.2       | 778.1     | 787.2      | 0.0 | 20.0   | 1    | 300 | 20   |
| 199 | 40    | 120 | 2   | (60, 60)          | *   | 911.4  | 911.4       | 898.3     | 911.4      | 0.0 | 1.5    | 1    | 300 | 10   |
| 200 | 40    | 120 | 2   | (40, 80)          | *   | 911.4  | 911.4       | 898.3     | 911.4      | 0.0 | 2.3    | 1    | 300 | 35   |
| 201 | 40    | 120 | 3   | (40, 40, 40)      | *   | 984.6  | 984.6       | 969.3     | 978.5      | 0.0 | 26.6   | 2    | 300 | 93   |
| 202 | 40    | 120 | 3   | (20, 40, 60)      | *   | 944.0  | 944.0       | 927.9     | 944.0      | 0.0 | 28.0   | 1    | 300 | 33   |
| 203 | 40    | 120 | 4   | (30, 30, 30, 30)  | *   | 958.2  | 958.2       | 940.5     | 956.0      | 0.0 | 52.2   | 2    | 300 | 140  |
| 204 | 40    | 120 | 4   | (10, 15, 30, 65)  |     |        | 991.1       | 979.7     | 991.1      |     | TL     | 2    | 300 | 155  |
| 205 | 40    | 120 | 2   | (60, 60)          | *   | 909.6  | 909.6       | 883.5     | 909.3      | 0.0 | 119.5  | 3    | 300 | 155  |
| 206 | 40    | 120 | 2   | (40, 80)          | *   | 909.6  | 909.6       | 883.4     | 908.6      | 0.0 | 110.0  | 3    | 300 | 149  |
| 207 | 40    | 120 | 3   | (40, 40, 40)      | *   | 917.2  | 917.2       | 893.9     | 917.2      | 0.0 | 103.9  | 1    | 300 | 88   |
| 208 | 40    | 120 | 3   | (20, 40, 60)      | *   | 909.6  | 909.5       | 884.6     | 909.5      | 0.0 | 428.6  | 2    | 300 | 165  |
| 209 | 40    | 120 | 4   | (30, 30, 30, 30)  | *   | 931.8  | 931.8       | 909.9     | 929.7      | 0.0 | 480.5  | 5    | 300 | 147  |
| 210 | 40    | 120 | 4   | (10, 15, 30, 65)  | *   | 922.4  | 922.4       | 895.5     | 921.3      | 0.0 | 1696.8 | 4    | 300 | 138  |
| 211 | 40    | 240 | 2   | (120, 120)        | *   | 615.5  | 615.5       | 605.1     | 615.5      | 0.0 | 21.4   | 1    | 300 | 30   |
| 212 | 40    | 240 | 2   | (80, 160)         | *   | 615.5  | 615.5       | 605.1     | 615.5      | 0.0 | 32.5   | 1    | 300 | 52   |
| 213 | 40    | 240 | 3   | (80, 80, 80)      | *   | 615.5  | 615.5       | 605.3     | 615.5      | 0.0 | 326.8  | 1    | 300 | 43   |
| 214 | 40    | 240 | 3   | (40, 80, 120)     | *   | 615.5  | 615.5       | 605.1     | 615.5      | 0.0 | 1530.1 | 1    | 300 | 66   |
| 215 | 40    | 240 | 4   | (60, 60, 60, 60)  | *   | 615.5  | 615.5       | 606.2     | 615.5      | 0.0 | 875.9  | 1    | 300 | 40   |
| 216 | 40    | 240 | 4   | (20, 30, 60, 130) |     |        |             |           |            |     | TL     | 0    | 0   | 0    |
| 217 | 40    | 240 | 2   | (120, 120)        | *   | 676.7  | 676.7       | 671.4     | 676.7      | 0.0 | 23.7   | 1    | 300 | 31   |
| 218 | 40    | 240 | 2   | (80, 160)         | *   | 676.7  | 676.7       | 671.4     | 676.7      | 0.0 | 31.4   | 1    | 300 | 30   |
| 219 | 40    | 240 | 3   | (80, 80, 80)      | *   | 676.7  | 676.7       | 671.5     | 676.7      | 0.0 | 195.3  | 1    | 300 | 29   |
| 220 | 40    | 240 | 3   | (40, 80, 120)     | *   | 676.7  | 676.7       | 671.4     | 676.7      | 0.0 | 385.1  | 1    | 300 | 30   |
| 221 | 40    | 240 | 4   | (60, 60, 60, 60)  |     |        | 726.9       | 714.6     | 726.9      |     | TL     | 1    | 300 | 126  |
| 222 | 40    | 240 | 4   | (20, 30, 60, 130) |     |        | 715.4       | 710.0     | 715.4      |     | TL     | 1    | 300 | 10   |
| 223 | 40    | 240 | 2   | (120, 120)        |     |        | 662.7       | 647.1     | 662.7      |     | TL     | 1    | 300 | 215  |
| 224 | 40    | 240 | 2   | (80, 160)         |     |        | 667.0       | 647.1     | 667.0      |     | TL     | 1    | 300 | 205  |
| 225 | 40    | 240 | 3   | (80, 80, 80)      |     |        | 662.2       | 647.1     | 662.2      |     | TL     | 1    | 300 | 60   |
| 226 | 40    | 240 | 3   | (40, 80, 120)     |     |        | 656.1       | 647.1     | 656.1      |     | TL     | 1    | 300 | 40   |
| 227 | 40    | 240 | 4   | (60, 60, 60, 60)  |     |        | 648.1       | 648.1     | 648.1      |     | TL     | 1    | 300 | 0    |
| 228 | 40    | 240 | 4   | (20, 30, 60, 130) |     |        |             |           |            |     | TL     | 0    | 0   | 0    |
| 229 | 40    | 240 | 2   | (120, 120)        | *   | 659.5  | 659.5       | 647.5     | 659.5      | 0.0 | 43.0   | 1    | 300 | 50   |
| 230 | 40    | 240 | 2   | (80, 160)         | *   | 659.5  | 659.5       | 647.5     | 659.5      | 0.0 | 52.7   | 1    | 300 | 64   |
| 231 | 40    | 240 | 3   | (80, 80, 80)      | *   | 659.5  | 659.5       | 648.8     | 659.5      | 0.0 | 572.3  | 1    | 300 | 61   |
| 232 | 40    | 240 | 3   | (40, 80, 120)     | *   | 659.5  | 659.5       | 647.5     | 659.5      | 0.0 | 594.6  | 1    | 300 | 42   |
| 233 | 40    | 240 | 4   | (60, 60, 60, 60)  | *   | 659.5  | 659.5       | 649.5     | 659.5      | 0.0 | 1204.0 | 1    | 300 | 30   |
| 234 | 40    | 240 | 4   | (20, 30, 60, 130) |     |        | 652.8       | 649.3     | 652.8      |     | TL     | 1    | 300 | 0    |
| 235 | 40    | 240 | 2   | (120, 120)        | *   | 700.4  | 700.4       | 689.9     | 700.4      | 0.0 | 95.5   | 1    | 300 | 83   |
| 236 | 40    | 240 | 2   | (80, 160)         | *   | 700.4  | 700.4       | 689.9     | 700.4      | 0.0 | 110.7  | 1    | 300 | 71   |
| 237 | 40    | 240 | 3   | (80, 80, 80)      | *   | 700.4  | 700.4       | 690.4     | 700.4      | 0.0 | 1689.8 | 1    | 300 | 70   |
| 238 | 40    | 240 | 3   | (40, 80, 120)     | *   | 700.4  | 700.4       | 689.9     | 700.4      | 0.0 | 2654.5 | 1    | 300 | 72   |
| 239 | 40    | 240 | 4   | (60, 60, 60, 60)  |     |        | 699.3       | 690.9     | 699.3      |     | TL     | 1    | 300 | 32   |
| 240 | 40    | 240 | 4   | (20, 30, 60, 130) |     |        |             |           |            |     | TL     | 0    | 0   | 0    |
| 241 | 50    | 120 | 2   | (60, 60)          |     | 1345.8 | 1268.9      | 1244.4    | 1263.7     | 6.0 | TL     | 25   | 300 | 320  |
| 242 | 50    | 120 | 2   | (40, 80)          |     | 1342.3 | 1260.3      | 1236.4    | 1252.9     | 6.5 | TL     | 15   | 300 | 320  |
| 243 | 50    | 120 | 3   | (40, 40, 40)      |     | 1365.3 | 1293.5      | 1263.3    | 1289.5     | 5.5 | TL     | 13   | 300 | 320  |
| 244 | 50    | 120 | 3   | (20, 40, 60)      |     | 1333.4 | 1315.0      | 1257.8    | 1311.8     | 1.4 | TL     | 4    | 300 | 303  |
| 245 | 50    | 120 | 4   | (30, 30, 30, 30)  |     | 1358.6 | 1353.2      | 1339.1    | 1345.6     | 0.4 | TL     | 26   | 300 | 320  |
| 246 | 50    | 120 | 4   | (10, 15, 30, 65)  |     | 1380.7 | 1309.4      | 1287.2    | 1308.0     | 5.4 | TL     | 3    | 300 | 198  |
| 247 | 50    | 120 | 2   | (60, 60)          | *   | 978.4  | 978.4       | 959.2     | 978.1      | 0.0 | 31.1   | 2    | 300 | 150  |
| 248 | 50    | 120 | 2   | (40, 80)          | *   | 978.4  | 978.4       | 957.9     | 976.5      | 0.0 | 87.3   | 3    | 300 | 150  |
| 249 | 50    | 120 | 3   | (40, 40, 40)      | *   | 1066.8 | 1066.7      | 1042.1    | 1061.7     | 0.0 | 1228.5 | 15   | 300 | 270  |
| 250 | 50    | 120 | 3   | (20, 40, 60)      |     | 1020.3 | 1015.2      | 992.0     | 1007.5     | 0.5 | TL     | 37   | 300 | 320  |
| 251 | 50    | 120 | 4   | (30, 30, 30, 30)  | *   | 1021.8 | 1021.8      | 1003.5    | 1021.8     | 0.0 | 55.9   | 1    | 300 | 79   |
| 252 | 50    | 120 | 4   | (10, 15, 30, 65)  |     | 1055.8 | 1053.6      | 1037.0    | 1052.8     | 0.2 | TL     | 3    | 300 | 146  |
| 253 | 50    | 120 | 2   | (60, 60)          | *   | 974.0  | 974.0       | 945.9     | 967.9      | 0.0 | 3333.7 | 22   | 300 | 320  |
| 254 | 50    | 120 | 2   | (40, 80)          |     | 974.0  | 971.5       | 941.6     | 963.7      | 0.3 | TL     | 22   | 300 | 320  |
| 255 | 50    | 120 | 3   | (40, 40, 40)      | *   | 1024.7 | 1024.7      | 997.0     | 1017.8     | 0.0 | 223.2  | 2    | 300 | 144  |
| 256 | 50    | 120 | 3   | (20, 40, 60)      | *   | 989.8  | 989.8       | 968.9     | 989.8      | 0.0 | 337.0  | 2    | 300 | 132  |
| 257 | 50    | 120 | 4   | (30, 30, 30, 30)  |     | 1018.7 | 1016.3      | 981.5     | 1001.8     | 0.2 | TL     | 13   | 300 | 277  |

Continued on next page

| No. | $ V $ | $Q$ | $m$ | $Q$               | opt | $UB$   | $LB_{tree}$ | $LB_{LP}$ | $LB_{cut}$ | gap  | time   | #BaB | #CC | #SRI |
|-----|-------|-----|-----|-------------------|-----|--------|-------------|-----------|------------|------|--------|------|-----|------|
| 258 | 50    | 120 | 4   | (10, 15, 30, 65)  | *   | 991.1  | 991.1       | 973.3     | 990.9      | 0.0  | 2114.0 | 3    | 300 | 165  |
| 259 | 50    | 120 | 2   | (60, 60)          | *   | 1035.3 | 1035.3      | 1011.9    | 1035.3     | 0.0  | 30.0   | 1    | 300 | 100  |
| 260 | 50    | 120 | 2   | (40, 80)          | *   | 1030.1 | 1030.1      | 1011.7    | 1030.1     | 0.0  | 29.0   | 1    | 300 | 72   |
| 261 | 50    | 120 | 3   | (40, 40, 40)      | *   | 1079.9 | 1079.9      | 1071.8    | 1079.9     | 0.0  | 57.4   | 1    | 300 | 30   |
| 262 | 50    | 120 | 3   | (20, 40, 60)      | *   | 1051.5 | 1051.4      | 1024.9    | 1043.8     | 0.0  | 1463.7 | 6    | 300 | 229  |
| 263 | 50    | 120 | 4   | (30, 30, 30, 30)  |     | 1079.7 | 1077.1      | 1044.8    | 1067.7     | 0.2  | TL     | 9    | 300 | 320  |
| 264 | 50    | 120 | 4   | (10, 15, 30, 65)  |     |        | 1083.9      | 1062.8    | 1083.9     |      | TL     | 1    | 300 | 110  |
| 265 | 50    | 120 | 2   | (60, 60)          |     | 990.9  | 970.4       | 940.4     | 964.6      | 2.1  | TL     | 18   | 300 | 320  |
| 266 | 50    | 120 | 2   | (40, 80)          |     | 990.9  | 969.1       | 939.2     | 963.1      | 2.2  | TL     | 13   | 300 | 320  |
| 267 | 50    | 120 | 3   | (40, 40, 40)      |     | 1012.7 | 1007.4      | 980.2     | 997.0      | 0.5  | TL     | 40   | 300 | 320  |
| 268 | 50    | 120 | 3   | (20, 40, 60)      |     | 996.9  | 975.7       | 947.0     | 972.6      | 2.1  | TL     | 7    | 300 | 320  |
| 269 | 50    | 120 | 4   | (30, 30, 30, 30)  |     | 1077.0 | 1071.1      | 1055.6    | 1061.9     | 0.5  | TL     | 56   | 300 | 320  |
| 270 | 50    | 120 | 4   | (10, 15, 30, 65)  |     | 1084.5 | 1079.2      | 1065.0    | 1075.8     | 0.5  | TL     | 3    | 300 | 147  |
| 271 | 50    | 240 | 2   | (120, 120)        | *   | 663.3  | 663.3       | 658.2     | 663.3      | 0.0  | 17.5   | 1    | 300 | 20   |
| 272 | 50    | 240 | 2   | (80, 160)         | *   | 663.3  | 663.3       | 658.2     | 663.3      | 0.0  | 19.6   | 1    | 300 | 20   |
| 273 | 50    | 240 | 3   | (80, 80, 80)      | *   | 663.3  | 663.3       | 658.2     | 663.3      | 0.0  | 401.8  | 1    | 300 | 30   |
| 274 | 50    | 240 | 3   | (40, 80, 120)     | *   | 663.3  | 663.3       | 658.2     | 663.3      | 0.0  | 582.8  | 1    | 300 | 20   |
| 275 | 50    | 240 | 4   | (60, 60, 60, 60)  |     |        | 663.3       | 658.9     | 663.3      |      | TL     | 1    | 300 | 20   |
| 276 | 50    | 240 | 4   | (20, 30, 60, 130) |     |        |             |           |            |      | TL     | 0    | 0   | 0    |
| 277 | 50    | 240 | 2   | (120, 120)        | *   | 883.6  | 883.6       | 869.7     | 883.6      | 0.0  | 54.6   | 1    | 300 | 40   |
| 278 | 50    | 240 | 2   | (80, 160)         | *   | 883.6  | 883.6       | 869.7     | 883.6      | 0.0  | 41.9   | 1    | 300 | 30   |
| 279 | 50    | 240 | 3   | (80, 80, 80)      | *   | 890.5  | 890.5       | 871.8     | 890.5      | 0.0  | 1644.4 | 1    | 300 | 114  |
| 280 | 50    | 240 | 3   | (40, 80, 120)     | *   | 883.6  | 883.6       | 870.0     | 883.6      | 0.0  | 670.5  | 1    | 300 | 30   |
| 281 | 50    | 240 | 4   | (60, 60, 60, 60)  |     |        | 895.1       | 877.1     | 895.1      |      | TL     | 1    | 300 | 90   |
| 282 | 50    | 240 | 4   | (20, 30, 60, 130) |     |        | 883.4       | 872.7     | 883.4      |      | TL     | 1    | 300 | 30   |
| 283 | 50    | 240 | 2   | (120, 120)        | *   | 875.1  | 875.1       | 861.1     | 875.1      | 0.0  | 467.8  | 1    | 300 | 132  |
| 284 | 50    | 240 | 2   | (80, 160)         | *   | 875.1  | 875.1       | 861.1     | 875.1      | 0.0  | 435.9  | 1    | 300 | 122  |
| 285 | 50    | 240 | 3   | (80, 80, 80)      |     |        | 873.9       | 861.5     | 873.9      |      | TL     | 1    | 300 | 101  |
| 286 | 50    | 240 | 3   | (40, 80, 120)     |     |        | 872.3       | 861.4     | 872.3      |      | TL     | 1    | 300 | 82   |
| 287 | 50    | 240 | 4   | (60, 60, 60, 60)  |     |        | 877.2       | 868.7     | 877.2      |      | TL     | 1    | 300 | 10   |
| 288 | 50    | 240 | 4   | (20, 30, 60, 130) |     |        | 861.5       | 861.5     | 861.5      |      | TL     | 1    | 300 | 0    |
| 289 | 50    | 240 | 2   | (120, 120)        |     | 1119.5 | 1026.3      | 993.8     | 1023.3     | 9.0  | TL     | 4    | 300 | 320  |
| 290 | 50    | 240 | 2   | (80, 160)         |     | 1112.4 | 1010.8      | 993.8     | 1008.1     | 10.0 | TL     | 3    | 300 | 275  |
| 291 | 50    | 240 | 3   | (80, 80, 80)      |     |        | 1011.6      | 997.2     | 1011.6     |      | TL     | 1    | 300 | 102  |
| 292 | 50    | 240 | 3   | (40, 80, 120)     |     |        | 1010.6      | 994.2     | 1010.6     |      | TL     | 1    | 300 | 50   |
| 293 | 50    | 240 | 4   | (60, 60, 60, 60)  |     |        | 1021.4      | 1011.6    | 1021.4     |      | TL     | 1    | 300 | 10   |
| 294 | 50    | 240 | 4   | (20, 30, 60, 130) |     |        | 998.7       | 998.7     | 998.7      |      | TL     | 1    | 0   | 0    |
| 295 | 50    | 240 | 2   | (120, 120)        | *   | 633.0  | 633.0       | 625.5     | 633.0      | 0.0  | 144.7  | 1    | 300 | 20   |
| 296 | 50    | 240 | 2   | (80, 160)         | *   | 633.0  | 633.0       | 625.5     | 633.0      | 0.0  | 270.4  | 1    | 300 | 40   |
| 297 | 50    | 240 | 3   | (80, 80, 80)      |     |        | 632.6       | 625.5     | 632.6      |      | TL     | 1    | 300 | 30   |
| 298 | 50    | 240 | 3   | (40, 80, 120)     |     |        | 627.9       | 625.5     | 627.9      |      | TL     | 1    | 300 | 0    |
| 299 | 50    | 240 | 4   | (60, 60, 60, 60)  |     |        |             |           |            |      | TL     | 0    | 0   | 0    |
| 300 | 50    | 240 | 4   | (20, 30, 60, 130) |     |        |             |           |            |      | TL     | 0    | 0   | 0    |
| 301 | 60    | 120 | 2   | (60, 60)          | *   | 989.1  | 989.1       | 967.7     | 980.4      | 0.0  | 3272.7 | 19   | 300 | 320  |
| 302 | 60    | 120 | 2   | (40, 80)          |     | 989.1  | 988.4       | 967.0     | 980.3      | 0.1  | TL     | 20   | 300 | 320  |
| 303 | 60    | 120 | 3   | (40, 40, 40)      |     | 1008.7 | 1004.3      | 980.4     | 997.6      | 0.4  | TL     | 6    | 300 | 320  |
| 304 | 60    | 120 | 3   | (20, 40, 60)      |     | 993.4  | 985.2       | 969.3     | 982.2      | 0.8  | TL     | 3    | 300 | 229  |
| 305 | 60    | 120 | 4   | (30, 30, 30, 30)  |     | 1016.0 | 1010.4      | 990.2     | 1007.5     | 0.5  | TL     | 3    | 300 | 252  |
| 306 | 60    | 120 | 4   | (10, 15, 30, 65)  |     |        | 998.0       | 984.9     | 998.0      |      | TL     | 1    | 300 | 126  |
| 307 | 60    | 120 | 2   | (60, 60)          | *   | 1114.8 | 1114.8      | 1094.7    | 1114.2     | 0.0  | 65.6   | 2    | 300 | 190  |
| 308 | 60    | 120 | 2   | (40, 80)          | *   | 1121.6 | 1121.6      | 1097.7    | 1119.2     | 0.0  | 470.0  | 8    | 300 | 264  |
| 309 | 60    | 120 | 3   | (40, 40, 40)      |     | 1167.9 | 1163.3      | 1130.4    | 1157.5     | 0.4  | TL     | 35   | 300 | 320  |
| 310 | 60    | 120 | 3   | (20, 40, 60)      | *   | 1141.7 | 1141.7      | 1115.7    | 1139.0     | 0.0  | 860.2  | 6    | 300 | 298  |
| 311 | 60    | 120 | 4   | (30, 30, 30, 30)  | *   | 1167.6 | 1167.6      | 1147.3    | 1166.8     | 0.0  | 625.5  | 3    | 300 | 178  |
| 312 | 60    | 120 | 4   | (10, 15, 30, 65)  |     | 1169.0 | 1164.3      | 1135.0    | 1160.5     | 0.4  | TL     | 16   | 300 | 277  |
| 313 | 60    | 120 | 2   | (60, 60)          | *   | 957.1  | 957.1       | 932.3     | 954.5      | 0.0  | 1727.5 | 9    | 300 | 320  |
| 314 | 60    | 120 | 2   | (40, 80)          | *   | 954.6  | 954.5       | 931.8     | 952.8      | 0.0  | 848.7  | 5    | 300 | 307  |
| 315 | 60    | 120 | 3   | (40, 40, 40)      |     | 965.8  | 965.4       | 937.3     | 960.0      | 0.0  | TL     | 10   | 300 | 320  |
| 316 | 60    | 120 | 3   | (20, 40, 60)      |     |        | 957.1       | 933.8     | 957.1      |      | TL     | 3    | 300 | 273  |
| 317 | 60    | 120 | 4   | (30, 30, 30, 30)  | *   | 963.1  | 963.1       | 949.4     | 963.1      | 0.0  | 525.8  | 1    | 300 | 85   |
| 318 | 60    | 120 | 4   | (10, 15, 30, 65)  |     |        | 959.8       | 943.6     | 959.8      |      | TL     | 1    | 300 | 93   |
| 319 | 60    | 120 | 2   | (60, 60)          | *   | 1002.5 | 1002.5      | 979.2     | 998.9      | 0.0  | 1048.2 | 5    | 300 | 320  |
| 320 | 60    | 120 | 2   | (40, 80)          | *   | 1002.5 | 1002.5      | 979.0     | 998.3      | 0.0  | 2776.8 | 15   | 300 | 320  |
| 321 | 60    | 120 | 3   | (40, 40, 40)      |     | 1047.4 | 1032.8      | 1004.5    | 1028.2     | 1.4  | TL     | 7    | 300 | 320  |
| 322 | 60    | 120 | 3   | (20, 40, 60)      |     | 1005.9 | 1000.9      | 982.2     | 1000.6     | 0.5  | TL     | 2    | 300 | 257  |

Continued on next page

| No. | $ V $ | $Q$ | $m$ | $Q$               | opt | $UB$   | $LB_{tree}$ | $LB_{LP}$ | $LB_{cut}$ | gap | time   | #BaB | #CC | #SRI |
|-----|-------|-----|-----|-------------------|-----|--------|-------------|-----------|------------|-----|--------|------|-----|------|
| 323 | 60    | 120 | 4   | (30, 30, 30, 30)  |     | 1049.9 | 1041.8      | 1016.3    | 1039.6     | 0.8 | TL     | 6    | 300 | 320  |
| 324 | 60    | 120 | 4   | (10, 15, 30, 65)  |     |        | 1021.2      | 1009.9    | 1021.2     |     | TL     | 1    | 300 | 75   |
| 325 | 60    | 120 | 2   | (60, 60)          | *   | 1063.9 | 1063.9      | 1038.1    | 1058.7     | 0.0 | 1583.8 | 13   | 300 | 320  |
| 326 | 60    | 120 | 2   | (40, 80)          |     | 1063.9 | 1063.0      | 1037.4    | 1057.2     | 0.1 | TL     | 31   | 300 | 320  |
| 327 | 60    | 120 | 3   | (40, 40, 40)      |     | 1069.2 | 1064.2      | 1042.7    | 1062.3     | 0.5 | TL     | 4    | 300 | 303  |
| 328 | 60    | 120 | 3   | (20, 40, 60)      |     | 1063.9 | 1062.4      | 1039.4    | 1059.9     | 0.1 | TL     | 4    | 300 | 279  |
| 329 | 60    | 120 | 4   | (30, 30, 30, 30)  |     |        | 1088.1      | 1076.2    | 1088.1     |     | TL     | 2    | 300 | 195  |
| 330 | 60    | 120 | 4   | (10, 15, 30, 65)  |     |        | 1067.4      | 1060.2    | 1067.4     |     | TL     | 1    | 300 | 42   |
| 331 | 60    | 240 | 2   | (120, 120)        |     | 943.3  | 928.3       | 915.1     | 927.4      | 1.6 | TL     | 2    | 300 | 203  |
| 332 | 60    | 240 | 2   | (80, 160)         |     | 934.1  | 929.9       | 915.1     | 929.8      | 0.5 | TL     | 3    | 300 | 224  |
| 333 | 60    | 240 | 3   | (80, 80, 80)      |     |        | 923.4       | 915.2     | 923.4      |     | TL     | 1    | 300 | 40   |
| 334 | 60    | 240 | 3   | (40, 80, 120)     |     |        | 921.0       | 915.1     | 921.0      |     | TL     | 1    | 300 | 20   |
| 335 | 60    | 240 | 4   | (60, 60, 60, 60)  |     |        | 918.3       | 918.3     | 918.3      |     | TL     | 1    | 0   | 0    |
| 336 | 60    | 240 | 4   | (20, 30, 60, 130) |     |        |             |           |            |     | TL     | 0    | 0   | 0    |
| 337 | 60    | 240 | 2   | (120, 120)        | *   | 915.6  | 915.6       | 898.0     | 915.6      | 0.0 | 2046.5 | 1    | 300 | 239  |
| 338 | 60    | 240 | 2   | (80, 160)         | *   | 915.6  | 915.6       | 898.0     | 915.6      | 0.0 | 1845.7 | 1    | 300 | 218  |
| 339 | 60    | 240 | 3   | (80, 80, 80)      |     |        | 912.0       | 898.9     | 912.0      |     | TL     | 1    | 300 | 80   |
| 340 | 60    | 240 | 3   | (40, 80, 120)     |     |        | 909.1       | 898.8     | 909.1      |     | TL     | 1    | 300 | 50   |
| 341 | 60    | 240 | 4   | (60, 60, 60, 60)  |     |        | 905.7       | 903.1     | 905.7      |     | TL     | 1    | 300 | 10   |
| 342 | 60    | 240 | 4   | (20, 30, 60, 130) |     |        |             |           |            |     | TL     | 0    | 0   | 0    |
| 343 | 60    | 240 | 2   | (120, 120)        |     | 823.5  | 815.5       | 791.1     | 812.8      | 1.0 | TL     | 10   | 300 | 320  |
| 344 | 60    | 240 | 2   | (80, 160)         |     | 820.6  | 815.0       | 791.1     | 812.9      | 0.7 | TL     | 8    | 300 | 320  |
| 345 | 60    | 240 | 3   | (80, 80, 80)      |     |        | 816.0       | 791.9     | 816.0      |     | TL     | 1    | 300 | 170  |
| 346 | 60    | 240 | 3   | (40, 80, 120)     |     |        | 815.4       | 791.4     | 815.4      |     | TL     | 1    | 300 | 148  |
| 347 | 60    | 240 | 4   | (60, 60, 60, 60)  |     |        | 803.4       | 802.1     | 803.4      |     | TL     | 1    | 300 | 20   |
| 348 | 60    | 240 | 4   | (20, 30, 60, 130) |     |        |             |           |            |     | TL     | 0    | 0   | 0    |
| 349 | 60    | 240 | 2   | (120, 120)        |     |        | 1117.1      | 1106.5    | 1117.1     |     | TL     | 2    | 300 | 239  |
| 350 | 60    | 240 | 2   | (80, 160)         |     |        | 1116.7      | 1106.5    | 1116.7     |     | TL     | 1    | 300 | 243  |
| 351 | 60    | 240 | 3   | (80, 80, 80)      |     |        | 1112.6      | 1108.8    | 1112.6     |     | TL     | 1    | 300 | 20   |
| 352 | 60    | 240 | 3   | (40, 80, 120)     |     |        | 1110.5      | 1106.9    | 1110.5     |     | TL     | 1    | 300 | 23   |
| 353 | 60    | 240 | 4   | (60, 60, 60, 60)  |     |        |             |           |            |     | TL     | 0    | 0   | 0    |
| 354 | 60    | 240 | 4   | (20, 30, 60, 130) |     |        |             |           |            |     | TL     | 0    | 0   | 0    |
| 355 | 60    | 240 | 2   | (120, 120)        | *   | 764.3  | 764.3       | 748.6     | 764.3      | 0.0 | 1109.3 | 1    | 300 | 134  |
| 356 | 60    | 240 | 2   | (80, 160)         | *   | 764.3  | 764.3       | 748.6     | 764.3      | 0.0 | 1128.9 | 1    | 300 | 127  |
| 357 | 60    | 240 | 3   | (80, 80, 80)      |     |        | 755.8       | 748.6     | 755.8      |     | TL     | 1    | 300 | 30   |
| 358 | 60    | 240 | 3   | (40, 80, 120)     |     |        | 754.0       | 748.6     | 754.0      |     | TL     | 1    | 300 | 20   |
| 359 | 60    | 240 | 4   | (60, 60, 60, 60)  |     |        |             |           |            |     | TL     | 0    | 0   | 0    |
| 360 | 60    | 240 | 4   | (20, 30, 60, 130) |     |        |             |           |            |     | TL     | 0    | 0   | 0    |
| 361 | 70    | 120 | 2   | (60, 60)          |     | 1347.2 | 1339.5      | 1313.1    | 1334.0     | 0.6 | TL     | 17   | 300 | 320  |
| 362 | 70    | 120 | 2   | (40, 80)          |     | 1334.1 | 1333.7      | 1309.8    | 1330.1     | 0.0 | TL     | 14   | 300 | 320  |
| 363 | 70    | 120 | 3   | (40, 40, 40)      | *   | 1367.3 | 1367.3      | 1347.9    | 1367.3     | 0.0 | 1592.0 | 1    | 300 | 194  |
| 364 | 70    | 120 | 3   | (20, 40, 60)      |     |        | 1340.4      | 1324.4    | 1340.4     |     | TL     | 3    | 300 | 164  |
| 365 | 70    | 120 | 4   | (30, 30, 30, 30)  |     | 1384.7 | 1381.4      | 1366.5    | 1377.8     | 0.2 | TL     | 2    | 300 | 212  |
| 366 | 70    | 120 | 4   | (10, 15, 30, 65)  |     |        | 1383.3      | 1365.3    | 1383.3     |     | TL     | 1    | 300 | 121  |
| 367 | 70    | 120 | 2   | (60, 60)          |     | 1292.2 | 1272.7      | 1246.6    | 1262.7     | 1.5 | TL     | 16   | 300 | 320  |
| 368 | 70    | 120 | 2   | (40, 80)          |     | 1278.7 | 1267.8      | 1243.6    | 1258.6     | 0.9 | TL     | 14   | 300 | 320  |
| 369 | 70    | 120 | 3   | (40, 40, 40)      |     |        | 1298.2      | 1285.7    | 1298.2     |     | TL     | 2    | 300 | 167  |
| 370 | 70    | 120 | 3   | (20, 40, 60)      |     |        | 1265.9      | 1248.5    | 1265.9     |     | TL     | 2    | 300 | 221  |
| 371 | 70    | 120 | 4   | (30, 30, 30, 30)  | *   | 1329.2 | 1329.2      | 1315.0    | 1329.2     | 0.0 | 323.9  | 2    | 300 | 183  |
| 372 | 70    | 120 | 4   | (10, 15, 30, 65)  |     |        | 1316.5      | 1302.6    | 1316.5     |     | TL     | 2    | 300 | 184  |
| 373 | 70    | 120 | 2   | (60, 60)          |     | 1351.0 | 1343.6      | 1324.0    | 1342.6     | 0.5 | TL     | 2    | 300 | 319  |
| 374 | 70    | 120 | 2   | (40, 80)          |     | 1357.2 | 1342.2      | 1324.6    | 1341.4     | 1.1 | TL     | 3    | 300 | 320  |
| 375 | 70    | 120 | 3   | (40, 40, 40)      |     |        | 1383.4      | 1371.6    | 1383.4     |     | TL     | 1    | 300 | 159  |
| 376 | 70    | 120 | 3   | (20, 40, 60)      |     |        | 1363.3      | 1352.9    | 1363.3     |     | TL     | 1    | 300 | 93   |
| 377 | 70    | 120 | 4   | (30, 30, 30, 30)  |     |        | 1388.7      | 1380.2    | 1388.7     |     | TL     | 1    | 300 | 36   |
| 378 | 70    | 120 | 4   | (10, 15, 30, 65)  |     |        | 1380.7      | 1380.7    | 1380.7     |     | TL     | 1    | 300 | 0    |
| 379 | 70    | 120 | 2   | (60, 60)          | *   | 1109.5 | 1109.5      | 1095.8    | 1106.8     | 0.0 | 808.5  | 5    | 300 | 294  |
| 380 | 70    | 120 | 2   | (40, 80)          | *   | 1109.5 | 1109.4      | 1088.5    | 1104.3     | 0.0 | 2390.7 | 24   | 300 | 320  |
| 381 | 70    | 120 | 3   | (40, 40, 40)      |     | 1162.2 | 1159.3      | 1139.3    | 1153.8     | 0.2 | TL     | 23   | 300 | 320  |
| 382 | 70    | 120 | 3   | (20, 40, 60)      | *   | 1131.9 | 1131.9      | 1113.8    | 1129.2     | 0.0 | 3135.4 | 5    | 300 | 278  |
| 383 | 70    | 120 | 4   | (30, 30, 30, 30)  |     | 1214.3 | 1209.6      | 1186.3    | 1202.6     | 0.4 | TL     | 10   | 300 | 320  |
| 384 | 70    | 120 | 4   | (10, 15, 30, 65)  |     | 1193.8 | 1182.9      | 1160.6    | 1181.2     | 0.9 | TL     | 2    | 300 | 250  |
| 385 | 70    | 120 | 2   | (60, 60)          | *   | 1073.7 | 1073.6      | 1047.4    | 1071.6     | 0.0 | 1817.8 | 6    | 300 | 320  |
| 386 | 70    | 120 | 2   | (40, 80)          | *   | 1072.9 | 1072.9      | 1047.4    | 1069.8     | 0.0 | 2790.6 | 14   | 300 | 320  |
| 387 | 70    | 120 | 3   | (40, 40, 40)      | *   | 1080.7 | 1080.7      | 1058.8    | 1076.2     | 0.0 | 2732.7 | 4    | 300 | 248  |

Continued on next page

| No. | $ V $ | $Q$ | $m$ | $Q$               | opt | $UB$   | $LB_{tree}$ | $LB_{LP}$ | $LB_{cut}$ | gap | time   | #BaB | #CC | #SRI |
|-----|-------|-----|-----|-------------------|-----|--------|-------------|-----------|------------|-----|--------|------|-----|------|
| 388 | 70    | 120 | 3   | (20, 40, 60)      |     |        | 1074.7      | 1049.4    | 1074.7     |     | TL     | 1    | 300 | 241  |
| 389 | 70    | 120 | 4   | (30, 30, 30, 30)  |     |        | 1094.3      | 1075.3    | 1094.3     |     | TL     | 2    | 300 | 215  |
| 390 | 70    | 120 | 4   | (10, 15, 30, 65)  |     |        | 1088.6      | 1067.4    | 1088.6     |     | TL     | 1    | 300 | 148  |
| 391 | 70    | 240 | 2   | (120, 120)        | *   | 970.1  | 970.1       | 958.6     | 970.1      | 0.0 | 427.4  | 1    | 300 | 72   |
| 392 | 70    | 240 | 2   | (80, 160)         | *   | 970.1  | 970.1       | 958.6     | 970.1      | 0.0 | 862.0  | 1    | 300 | 112  |
| 393 | 70    | 240 | 3   | (80, 80, 80)      |     |        | 965.0       | 958.6     | 965.0      |     | TL     | 1    | 300 | 10   |
| 394 | 70    | 240 | 3   | (40, 80, 120)     |     |        | 964.5       | 958.6     | 964.5      |     | TL     | 1    | 300 | 10   |
| 395 | 70    | 240 | 4   | (60, 60, 60, 60)  |     |        |             |           |            |     | TL     | 0    | 0   | 0    |
| 396 | 70    | 240 | 4   | (20, 30, 60, 130) |     |        |             |           |            |     | TL     | 0    | 0   | 0    |
| 397 | 70    | 240 | 2   | (120, 120)        | *   | 1009.6 | 1009.6      | 985.7     | 1007.4     | 0.0 | 3595.9 | 3    | 300 | 305  |
| 398 | 70    | 240 | 2   | (80, 160)         |     | 1009.6 | 1009.3      | 985.7     | 1007.6     | 0.0 | TL     | 3    | 300 | 300  |
| 399 | 70    | 240 | 3   | (80, 80, 80)      |     |        | 1005.0      | 990.2     | 1005.0     |     | TL     | 1    | 300 | 94   |
| 400 | 70    | 240 | 3   | (40, 80, 120)     |     |        | 1002.3      | 986.5     | 1002.3     |     | TL     | 1    | 300 | 77   |
| 401 | 70    | 240 | 4   | (60, 60, 60, 60)  |     |        | 1003.0      | 1001.0    | 1003.0     |     | TL     | 1    | 300 | 10   |
| 402 | 70    | 240 | 4   | (20, 30, 60, 130) |     |        | 818.6       | 818.6     | 818.6      |     | TL     | 1    | 0   | 0    |
| 403 | 70    | 240 | 2   | (120, 120)        |     |        | 1131.7      | 1109.4    | 1131.7     |     | TL     | 1    | 300 | 204  |
| 404 | 70    | 240 | 2   | (80, 160)         |     |        | 1131.4      | 1109.4    | 1131.4     |     | TL     | 1    | 300 | 186  |
| 405 | 70    | 240 | 3   | (80, 80, 80)      |     |        | 1118.1      | 1109.5    | 1118.1     |     | TL     | 1    | 300 | 10   |
| 406 | 70    | 240 | 3   | (40, 80, 120)     |     |        | 1112.4      | 1109.4    | 1112.4     |     | TL     | 1    | 300 | 0    |
| 407 | 70    | 240 | 4   | (60, 60, 60, 60)  |     |        |             |           |            |     | TL     | 0    | 0   | 0    |
| 408 | 70    | 240 | 4   | (20, 30, 60, 130) |     |        |             |           |            |     | TL     | 0    | 0   | 0    |
| 409 | 70    | 240 | 2   | (120, 120)        |     |        | 1001.5      | 987.1     | 1001.5     |     | TL     | 1    | 300 | 171  |
| 410 | 70    | 240 | 2   | (80, 160)         |     |        | 1001.0      | 987.1     | 1001.0     |     | TL     | 1    | 300 | 171  |
| 411 | 70    | 240 | 3   | (80, 80, 80)      |     |        | 990.8       | 987.6     | 990.8      |     | TL     | 1    | 300 | 10   |
| 412 | 70    | 240 | 3   | (40, 80, 120)     |     |        | 720.2       | 720.2     | 720.2      |     | TL     | 1    | 0   | 0    |
| 413 | 70    | 240 | 4   | (60, 60, 60, 60)  |     |        |             |           |            |     | TL     | 0    | 0   | 0    |
| 414 | 70    | 240 | 4   | (20, 30, 60, 130) |     |        |             |           |            |     | TL     | 0    | 0   | 0    |
| 415 | 70    | 240 | 2   | (120, 120)        |     |        | 958.5       | 937.2     | 958.5      |     | TL     | 1    | 300 | 259  |
| 416 | 70    | 240 | 2   | (80, 160)         |     |        | 958.4       | 937.2     | 958.4      |     | TL     | 1    | 300 | 257  |
| 417 | 70    | 240 | 3   | (80, 80, 80)      |     |        | 945.8       | 937.2     | 945.8      |     | TL     | 1    | 300 | 20   |
| 418 | 70    | 240 | 3   | (40, 80, 120)     |     |        | 945.8       | 937.2     | 945.8      |     | TL     | 1    | 300 | 10   |
| 419 | 70    | 240 | 4   | (60, 60, 60, 60)  |     |        | 954.9       | 954.9     | 954.9      |     | TL     | 1    | 0   | 0    |
| 420 | 70    | 240 | 4   | (20, 30, 60, 130) |     |        |             |           |            |     | TL     | 0    | 0   | 0    |
| 421 | 80    | 120 | 2   | (60, 60)          |     | 1414.5 | 1410.1      | 1385.1    | 1405.7     | 0.3 | TL     | 24   | 300 | 320  |
| 422 | 80    | 120 | 2   | (40, 80)          |     | 1413.4 | 1409.0      | 1384.0    | 1405.1     | 0.3 | TL     | 23   | 300 | 320  |
| 423 | 80    | 120 | 3   | (40, 40, 40)      |     | 1428.2 | 1423.8      | 1404.2    | 1420.8     | 0.3 | TL     | 13   | 300 | 320  |
| 424 | 80    | 120 | 3   | (20, 40, 60)      |     | 1414.7 | 1412.5      | 1389.9    | 1411.4     | 0.2 | TL     | 5    | 300 | 279  |
| 425 | 80    | 120 | 4   | (30, 30, 30, 30)  |     | 1499.7 | 1489.6      | 1479.4    | 1486.6     | 0.7 | TL     | 6    | 300 | 320  |
| 426 | 80    | 120 | 4   | (10, 15, 30, 65)  |     | 1462.2 | 1455.5      | 1440.5    | 1455.2     | 0.5 | TL     | 3    | 300 | 223  |
| 427 | 80    | 120 | 2   | (60, 60)          |     | 1325.3 | 1322.7      | 1299.2    | 1317.8     | 0.2 | TL     | 22   | 300 | 320  |
| 428 | 80    | 120 | 2   | (40, 80)          |     | 1330.6 | 1322.5      | 1300.9    | 1319.6     | 0.6 | TL     | 9    | 300 | 320  |
| 429 | 80    | 120 | 3   | (40, 40, 40)      | *   | 1373.4 | 1373.4      | 1361.9    | 1373.4     | 0.0 | 295.8  | 1    | 300 | 106  |
| 430 | 80    | 120 | 3   | (20, 40, 60)      |     |        | 1334.5      | 1320.7    | 1334.5     |     | TL     | 2    | 300 | 263  |
| 431 | 80    | 120 | 4   | (30, 30, 30, 30)  | *   | 1410.7 | 1410.7      | 1389.2    | 1410.3     | 0.0 | 1936.2 | 3    | 300 | 295  |
| 432 | 80    | 120 | 4   | (10, 15, 30, 65)  | *   | 1386.1 | 1386.1      | 1366.4    | 1386.1     | 0.0 | 1775.3 | 1    | 300 | 108  |
| 433 | 80    | 120 | 2   | (60, 60)          |     | 1570.0 | 1525.1      | 1505.4    | 1523.7     | 2.9 | TL     | 4    | 300 | 262  |
| 434 | 80    | 120 | 2   | (40, 80)          |     | 1557.7 | 1525.4      | 1505.0    | 1524.2     | 2.1 | TL     | 5    | 300 | 248  |
| 435 | 80    | 120 | 3   | (40, 40, 40)      |     | 1585.7 | 1566.8      | 1547.8    | 1564.6     | 1.2 | TL     | 6    | 300 | 320  |
| 436 | 80    | 120 | 3   | (20, 40, 60)      |     | 1570.5 | 1532.1      | 1515.5    | 1531.1     | 2.5 | TL     | 3    | 300 | 218  |
| 437 | 80    | 120 | 4   | (30, 30, 30, 30)  |     | 1576.5 | 1569.6      | 1558.6    | 1566.1     | 0.4 | TL     | 5    | 300 | 261  |
| 438 | 80    | 120 | 4   | (10, 15, 30, 65)  |     |        | 1585.2      | 1572.0    | 1585.2     |     | TL     | 1    | 300 | 193  |
| 439 | 80    | 120 | 2   | (60, 60)          |     | 1575.6 | 1572.1      | 1554.2    | 1567.6     | 0.2 | TL     | 19   | 300 | 320  |
| 440 | 80    | 120 | 2   | (40, 80)          | *   | 1561.0 | 1561.0      | 1545.2    | 1558.0     | 0.0 | 1771.6 | 9    | 300 | 304  |
| 441 | 80    | 120 | 3   | (40, 40, 40)      |     | 1617.1 | 1611.2      | 1590.6    | 1607.8     | 0.4 | TL     | 2    | 300 | 297  |
| 442 | 80    | 120 | 3   | (20, 40, 60)      |     |        | 1573.3      | 1557.0    | 1573.3     |     | TL     | 1    | 300 | 229  |
| 443 | 80    | 120 | 4   | (30, 30, 30, 30)  |     |        | 1647.4      | 1627.7    | 1647.4     |     | TL     | 1    | 300 | 202  |
| 444 | 80    | 120 | 4   | (10, 15, 30, 65)  |     |        | 1621.2      | 1608.9    | 1621.2     |     | TL     | 1    | 300 | 81   |
| 445 | 80    | 120 | 2   | (60, 60)          |     | 1447.6 | 1436.6      | 1414.1    | 1429.8     | 0.8 | TL     | 12   | 300 | 320  |
| 446 | 80    | 120 | 2   | (40, 80)          |     | 1447.6 | 1434.7      | 1412.3    | 1428.1     | 0.9 | TL     | 9    | 300 | 320  |
| 447 | 80    | 120 | 3   | (40, 40, 40)      |     |        | 1448.9      | 1430.3    | 1448.9     |     | TL     | 1    | 300 | 211  |
| 448 | 80    | 120 | 3   | (20, 40, 60)      |     |        | 1430.3      | 1415.2    | 1430.3     |     | TL     | 1    | 300 | 182  |
| 449 | 80    | 120 | 4   | (30, 30, 30, 30)  |     |        | 1495.5      | 1479.0    | 1495.5     |     | TL     | 1    | 300 | 136  |
| 450 | 80    | 120 | 4   | (10, 15, 30, 65)  |     |        | 1464.7      | 1454.0    | 1464.7     |     | TL     | 1    | 300 | 56   |
| 451 | 80    | 240 | 2   | (120, 120)        |     |        | 1340.6      | 1326.6    | 1340.6     |     | TL     | 1    | 300 | 209  |
| 452 | 80    | 240 | 2   | (80, 160)         |     |        | 1340.7      | 1326.6    | 1340.7     |     | TL     | 1    | 300 | 207  |

Continued on next page

| No. | $ V $ | $Q$ | $m$ | $Q$               | opt    | $UB$   | $LB_{tree}$ | $LB_{LP}$ | $LB_{cut}$ | gap | time   | #BaB | #CC | #SRI |
|-----|-------|-----|-----|-------------------|--------|--------|-------------|-----------|------------|-----|--------|------|-----|------|
| 453 | 80    | 240 | 3   | (80, 80, 80)      |        |        | 1333.3      | 1329.7    | 1333.3     |     | TL     | 1    | 300 | 10   |
| 454 | 80    | 240 | 3   | (40, 80, 120)     |        |        | 1328.5      | 1328.5    | 1328.5     |     | TL     | 1    | 300 | 0    |
| 455 | 80    | 240 | 4   | (60, 60, 60, 60)  |        |        |             |           |            |     | TL     | 0    | 0   | 0    |
| 456 | 80    | 240 | 4   | (20, 30, 60, 130) |        |        |             |           |            |     | TL     | 0    | 0   | 0    |
| 457 | 80    | 240 | 2   | (120, 120)        |        |        | 1159.5      | 1138.8    | 1159.5     |     | TL     | 1    | 300 | 191  |
| 458 | 80    | 240 | 2   | (80, 160)         |        |        | 1156.4      | 1138.7    | 1156.4     |     | TL     | 1    | 300 | 240  |
| 459 | 80    | 240 | 3   | (80, 80, 80)      |        |        | 1145.1      | 1140.4    | 1145.1     |     | TL     | 1    | 300 | 20   |
| 460 | 80    | 240 | 3   | (40, 80, 120)     |        |        | 1139.0      | 1139.0    | 1139.0     |     | TL     | 1    | 300 | 0    |
| 461 | 80    | 240 | 4   | (60, 60, 60, 60)  |        |        | 1152.5      | 1152.5    | 1152.5     |     | TL     | 1    | 0   | 0    |
| 462 | 80    | 240 | 4   | (20, 30, 60, 130) |        |        |             |           |            |     | TL     | 0    | 0   | 0    |
| 463 | 80    | 240 | 2   | (120, 120)        |        |        | 1328.6      | 1313.9    | 1328.6     |     | TL     | 1    | 300 | 286  |
| 464 | 80    | 240 | 2   | (80, 160)         |        |        | 1327.8      | 1313.9    | 1327.8     |     | TL     | 1    | 300 | 262  |
| 465 | 80    | 240 | 3   | (80, 80, 80)      |        |        | 1323.2      | 1314.6    | 1323.2     |     | TL     | 1    | 300 | 30   |
| 466 | 80    | 240 | 3   | (40, 80, 120)     |        |        | 1320.7      | 1314.1    | 1320.7     |     | TL     | 1    | 300 | 10   |
| 467 | 80    | 240 | 4   | (60, 60, 60, 60)  |        |        | 1322.9      | 1322.9    | 1322.9     |     | TL     | 1    | 0   | 0    |
| 468 | 80    | 240 | 4   | (20, 30, 60, 130) |        |        |             |           |            |     | TL     | 0    | 0   | 0    |
| 469 | 80    | 240 | 2   | (120, 120)        |        |        | 1168.0      | 1156.7    | 1168.0     |     | TL     | 1    | 300 | 169  |
| 470 | 80    | 240 | 2   | (80, 160)         |        |        | 1168.2      | 1156.7    | 1168.2     |     | TL     | 1    | 300 | 165  |
| 471 | 80    | 240 | 3   | (80, 80, 80)      |        |        | 1162.1      | 1157.2    | 1162.1     |     | TL     | 1    | 300 | 30   |
| 472 | 80    | 240 | 3   | (40, 80, 120)     |        |        | 1158.8      | 1157.5    | 1158.8     |     | TL     | 1    | 300 | 20   |
| 473 | 80    | 240 | 4   | (60, 60, 60, 60)  |        |        | 755.7       | 755.7     | 755.7      |     | TL     | 1    | 0   | 0    |
| 474 | 80    | 240 | 4   | (20, 30, 60, 130) |        |        |             |           |            |     | TL     | 0    | 0   | 0    |
| 475 | 80    | 240 | 2   | (120, 120)        | 1323.6 |        | 1315.5      | 1298.3    | 1313.0     | 0.6 | TL     | 4    | 300 | 320  |
| 476 | 80    | 240 | 2   | (80, 160)         | 1326.9 |        | 1315.1      | 1298.3    | 1313.1     | 0.9 | TL     | 3    | 300 | 286  |
| 477 | 80    | 240 | 3   | (80, 80, 80)      |        |        | 1316.0      | 1305.1    | 1316.0     |     | TL     | 1    | 300 | 70   |
| 478 | 80    | 240 | 3   | (40, 80, 120)     |        |        | 1307.9      | 1299.0    | 1307.9     |     | TL     | 1    | 300 | 50   |
| 479 | 80    | 240 | 4   | (60, 60, 60, 60)  |        |        | 1326.7      | 1322.7    | 1326.7     |     | TL     | 1    | 300 | 10   |
| 480 | 80    | 240 | 4   | (20, 30, 60, 130) |        |        | 1277.2      | 1277.2    | 1277.2     |     | TL     | 1    | 0   | 0    |
| 481 | 90    | 120 | 2   | (60, 60)          | 1531.3 |        | 1519.7      | 1498.3    | 1514.2     | 0.8 | TL     | 15   | 300 | 320  |
| 482 | 90    | 120 | 2   | (40, 80)          | 1531.2 |        | 1517.2      | 1496.2    | 1512.9     | 0.9 | TL     | 12   | 300 | 320  |
| 483 | 90    | 120 | 3   | (40, 40, 40)      | 1576.5 |        | 1547.6      | 1531.2    | 1545.8     | 1.8 | TL     | 2    | 300 | 320  |
| 484 | 90    | 120 | 3   | (20, 40, 60)      |        |        | 1533.4      | 1519.6    | 1533.4     |     | TL     | 1    | 300 | 231  |
| 485 | 90    | 120 | 4   | (30, 30, 30, 30)  |        |        | 1566.9      | 1553.3    | 1566.9     |     | TL     | 1    | 300 | 247  |
| 486 | 90    | 120 | 4   | (10, 15, 30, 65)  |        |        | 1556.5      | 1548.2    | 1556.5     |     | TL     | 1    | 300 | 80   |
| 487 | 90    | 120 | 2   | (60, 60)          | *      | 1559.6 | 1559.6      | 1528.5    | 1557.2     | 0.0 | 2032.9 | 13   | 300 | 320  |
| 488 | 90    | 120 | 2   | (40, 80)          |        | 1562.8 | 1559.8      | 1528.4    | 1556.6     | 0.2 | TL     | 19   | 300 | 320  |
| 489 | 90    | 120 | 3   | (40, 40, 40)      |        |        | 1591.9      | 1561.3    | 1591.9     |     | TL     | 1    | 300 | 312  |
| 490 | 90    | 120 | 3   | (20, 40, 60)      |        |        | 1566.3      | 1538.9    | 1566.3     |     | TL     | 1    | 300 | 254  |
| 491 | 90    | 120 | 4   | (30, 30, 30, 30)  |        |        | 1626.7      | 1604.0    | 1626.7     |     | TL     | 1    | 300 | 233  |
| 492 | 90    | 120 | 4   | (10, 15, 30, 65)  |        |        | 1610.0      | 1592.5    | 1610.0     |     | TL     | 1    | 300 | 95   |
| 493 | 90    | 120 | 2   | (60, 60)          |        | 1466.2 | 1435.4      | 1410.7    | 1433.2     | 2.1 | TL     | 7    | 300 | 320  |
| 494 | 90    | 120 | 2   | (40, 80)          |        | 1458.0 | 1434.6      | 1410.7    | 1432.0     | 1.6 | TL     | 8    | 300 | 320  |
| 495 | 90    | 120 | 3   | (40, 40, 40)      |        |        | 1444.1      | 1426.2    | 1444.1     |     | TL     | 1    | 300 | 291  |
| 496 | 90    | 120 | 3   | (20, 40, 60)      |        |        | 1429.3      | 1413.0    | 1429.3     |     | TL     | 1    | 300 | 243  |
| 497 | 90    | 120 | 4   | (30, 30, 30, 30)  |        |        | 1497.3      | 1486.9    | 1497.3     |     | TL     | 1    | 300 | 220  |
| 498 | 90    | 120 | 4   | (10, 15, 30, 65)  |        |        | 1478.1      | 1468.0    | 1478.1     |     | TL     | 1    | 300 | 54   |
| 499 | 90    | 120 | 2   | (60, 60)          |        | 1473.9 | 1473.0      | 1446.1    | 1469.5     | 0.1 | TL     | 25   | 300 | 320  |
| 500 | 90    | 120 | 2   | (40, 80)          |        | 1470.6 | 1467.5      | 1445.7    | 1465.4     | 0.2 | TL     | 24   | 300 | 320  |
| 501 | 90    | 120 | 3   | (40, 40, 40)      |        | 1485.9 | 1482.5      | 1461.4    | 1480.8     | 0.2 | TL     | 5    | 300 | 320  |
| 502 | 90    | 120 | 3   | (20, 40, 60)      |        |        | 1475.8      | 1451.7    | 1475.8     |     | TL     | 1    | 300 | 296  |
| 503 | 90    | 120 | 4   | (30, 30, 30, 30)  |        | 1542.8 | 1536.8      | 1515.0    | 1535.8     | 0.4 | TL     | 2    | 300 | 308  |
| 504 | 90    | 120 | 4   | (10, 15, 30, 65)  |        |        | 1493.2      | 1476.2    | 1493.2     |     | TL     | 1    | 300 | 162  |
| 505 | 90    | 120 | 2   | (60, 60)          |        | 1889.7 | 1881.5      | 1851.0    | 1878.4     | 0.4 | TL     | 17   | 300 | 320  |
| 506 | 90    | 120 | 2   | (40, 80)          |        | 1899.0 | 1873.6      | 1833.8    | 1871.1     | 1.3 | TL     | 8    | 300 | 320  |
| 507 | 90    | 120 | 3   | (40, 40, 40)      |        |        | 1927.6      | 1910.4    | 1927.6     |     | TL     | 1    | 300 | 236  |
| 508 | 90    | 120 | 3   | (20, 40, 60)      |        |        | 1886.4      | 1875.2    | 1886.4     |     | TL     | 1    | 300 | 136  |
| 509 | 90    | 120 | 4   | (30, 30, 30, 30)  |        |        | 1953.9      | 1945.9    | 1953.9     |     | TL     | 1    | 300 | 104  |
| 510 | 90    | 120 | 4   | (10, 15, 30, 65)  |        |        | 1925.6      | 1915.9    | 1925.6     |     | TL     | 1    | 300 | 43   |
| 511 | 90    | 240 | 2   | (120, 120)        |        |        | 1244.2      | 1225.4    | 1244.2     |     | TL     | 1    | 300 | 320  |
| 512 | 90    | 240 | 2   | (80, 160)         |        |        | 1240.6      | 1225.4    | 1240.6     |     | TL     | 1    | 300 | 295  |
| 513 | 90    | 240 | 3   | (80, 80, 80)      |        |        | 1232.4      | 1227.6    | 1232.4     |     | TL     | 1    | 300 | 21   |
| 514 | 90    | 240 | 3   | (40, 80, 120)     |        |        | 1230.7      | 1227.3    | 1230.7     |     | TL     | 1    | 300 | 10   |
| 515 | 90    | 240 | 4   | (60, 60, 60, 60)  |        |        | 939.5       | 939.5     | 939.5      |     | TL     | 1    | 0   | 0    |
| 516 | 90    | 240 | 4   | (20, 30, 60, 130) |        |        |             |           |            |     | TL     | 0    | 0   | 0    |
| 517 | 90    | 240 | 2   | (120, 120)        |        |        | 1178.4      | 1150.8    | 1178.4     |     | TL     | 1    | 300 | 320  |

Continued on next page

| No. | $ V $ | $Q$ | $m$ | $Q$               | opt      | $UB$ | $LB_{tree}$ | $LB_{LP}$ | $LB_{cut}$ | gap | time   | #BaB | #CC | #SRI |
|-----|-------|-----|-----|-------------------|----------|------|-------------|-----------|------------|-----|--------|------|-----|------|
| 518 | 90    | 240 | 2   | (80, 160)         |          |      | 1178.2      | 1149.6    | 1178.2     |     | TL     | 1    | 300 | 305  |
| 519 | 90    | 240 | 3   | (80, 80, 80)      |          |      | 1163.9      | 1152.8    | 1163.9     |     | TL     | 1    | 300 | 40   |
| 520 | 90    | 240 | 3   | (40, 80, 120)     |          |      | 1161.8      | 1151.2    | 1161.8     |     | TL     | 1    | 300 | 20   |
| 521 | 90    | 240 | 4   | (60, 60, 60, 60)  |          |      | 1161.8      | 1161.8    | 1161.8     |     | TL     | 1    | 0   | 0    |
| 522 | 90    | 240 | 4   | (20, 30, 60, 130) |          |      |             |           |            |     | TL     | 0    | 0   | 0    |
| 523 | 90    | 240 | 2   | (120, 120)        | 1222.5   |      | 1188.9      | 1164.7    | 1187.9     | 2.8 | TL     | 4    | 300 | 320  |
| 524 | 90    | 240 | 2   | (80, 160)         | 1228.7   |      | 1188.6      | 1164.7    | 1187.8     | 3.3 | TL     | 3    | 300 | 320  |
| 525 | 90    | 240 | 3   | (80, 80, 80)      |          |      | 1185.8      | 1167.0    | 1185.8     |     | TL     | 1    | 300 | 74   |
| 526 | 90    | 240 | 3   | (40, 80, 120)     |          |      | 1181.9      | 1166.8    | 1181.9     |     | TL     | 1    | 300 | 41   |
| 527 | 90    | 240 | 4   | (60, 60, 60, 60)  |          |      | 1187.3      | 1184.3    | 1187.3     |     | TL     | 1    | 300 | 0    |
| 528 | 90    | 240 | 4   | (20, 30, 60, 130) |          |      |             |           |            |     | TL     | 0    | 0   | 0    |
| 529 | 90    | 240 | 2   | (120, 120)        |          |      | 1017.2      | 1001.0    | 1017.2     |     | TL     | 1    | 300 | 269  |
| 530 | 90    | 240 | 2   | (80, 160)         |          |      | 1016.9      | 1000.5    | 1016.9     |     | TL     | 1    | 300 | 224  |
| 531 | 90    | 240 | 3   | (80, 80, 80)      |          |      | 1005.4      | 1001.0    | 1005.4     |     | TL     | 1    | 300 | 20   |
| 532 | 90    | 240 | 3   | (40, 80, 120)     |          |      | 1006.5      | 1001.0    | 1006.5     |     | TL     | 1    | 300 | 10   |
| 533 | 90    | 240 | 4   | (60, 60, 60, 60)  |          |      |             |           |            |     | TL     | 0    | 0   | 0    |
| 534 | 90    | 240 | 4   | (20, 30, 60, 130) |          |      |             |           |            |     | TL     | 0    | 0   | 0    |
| 535 | 90    | 240 | 2   | (120, 120)        |          |      | 1193.3      | 1186.2    | 1193.3     |     | TL     | 1    | 300 | 61   |
| 536 | 90    | 240 | 2   | (80, 160)         |          |      | 1192.2      | 1186.3    | 1192.2     |     | TL     | 1    | 300 | 70   |
| 537 | 90    | 240 | 3   | (80, 80, 80)      |          |      | 1188.9      | 1188.9    | 1188.9     |     | TL     | 1    | 0   | 0    |
| 538 | 90    | 240 | 3   | (40, 80, 120)     |          |      |             |           |            |     | TL     | 0    | 0   | 0    |
| 539 | 90    | 240 | 4   | (60, 60, 60, 60)  |          |      |             |           |            |     | TL     | 0    | 0   | 0    |
| 540 | 90    | 240 | 4   | (20, 30, 60, 130) |          |      |             |           |            |     | TL     | 0    | 0   | 0    |
| 541 | 100   | 120 | 2   | (60, 60)          | 1653.5   |      | 1649.6      | 1626.6    | 1646.4     | 0.2 | TL     | 13   | 300 | 320  |
| 542 | 100   | 120 | 2   | (40, 80)          | 1661.5   |      | 1646.7      | 1626.5    | 1644.0     | 0.9 | TL     | 8    | 300 | 320  |
| 543 | 100   | 120 | 3   | (40, 40, 40)      |          |      | 1690.8      | 1674.4    | 1690.8     |     | TL     | 1    | 300 | 248  |
| 544 | 100   | 120 | 3   | (20, 40, 60)      |          |      | 1655.0      | 1639.0    | 1655.0     |     | TL     | 1    | 300 | 168  |
| 545 | 100   | 120 | 4   | (30, 30, 30, 30)  |          |      | 1716.2      | 1698.4    | 1716.2     |     | TL     | 1    | 300 | 164  |
| 546 | 100   | 120 | 4   | (10, 15, 30, 65)  |          |      | 1716.4      | 1704.9    | 1716.4     |     | TL     | 1    | 300 | 86   |
| 547 | 100   | 120 | 2   | (60, 60)          | 2040.0   |      | 2001.2      | 1978.5    | 1999.6     | 1.9 | TL     | 4    | 300 | 320  |
| 548 | 100   | 120 | 2   | (40, 80)          | 2036.8   |      | 1997.5      | 1975.6    | 1996.9     | 2.0 | TL     | 5    | 300 | 320  |
| 549 | 100   | 120 | 3   | (40, 40, 40)      |          |      | 2011.3      | 1999.2    | 2011.3     |     | TL     | 1    | 300 | 120  |
| 550 | 100   | 120 | 3   | (20, 40, 60)      |          |      | 2000.2      | 1988.4    | 2000.2     |     | TL     | 1    | 300 | 71   |
| 551 | 100   | 120 | 4   | (30, 30, 30, 30)  |          |      | 2048.6      | 2043.4    | 2048.6     |     | TL     | 1    | 300 | 42   |
| 552 | 100   | 120 | 4   | (10, 15, 30, 65)  |          |      | 2019.1      | 2018.9    | 2019.1     |     | TL     | 1    | 300 | 0    |
| 553 | 100   | 120 | 2   | (60, 60)          | 1921.5   |      | 1899.8      | 1875.7    | 1899.5     | 1.1 | TL     | 3    | 300 | 309  |
| 554 | 100   | 120 | 2   | (40, 80)          | 1904.7   |      | 1899.0      | 1874.2    | 1896.3     | 0.3 | TL     | 10   | 300 | 320  |
| 555 | 100   | 120 | 3   | (40, 40, 40)      |          |      | 1970.6      | 1949.0    | 1970.6     |     | TL     | 1    | 300 | 169  |
| 556 | 100   | 120 | 3   | (20, 40, 60)      |          |      | 1917.3      | 1903.0    | 1917.3     |     | TL     | 1    | 300 | 97   |
| 557 | 100   | 120 | 4   | (30, 30, 30, 30)  |          |      | 1969.1      | 1958.2    | 1969.1     |     | TL     | 1    | 300 | 73   |
| 558 | 100   | 120 | 4   | (10, 15, 30, 65)  |          |      | 1961.3      | 1956.4    | 1961.3     |     | TL     | 1    | 300 | 20   |
| 559 | 100   | 120 | 2   | (60, 60)          | 1624.7   |      | 1609.5      | 1589.2    | 1608.0     | 0.9 | TL     | 9    | 300 | 320  |
| 560 | 100   | 120 | 2   | (40, 80)          | 1617.6   |      | 1597.8      | 1573.3    | 1595.3     | 1.2 | TL     | 12   | 300 | 320  |
| 561 | 100   | 120 | 3   | (40, 40, 40)      |          |      | 1636.8      | 1618.7    | 1636.8     |     | TL     | 3    | 300 | 320  |
| 562 | 100   | 120 | 3   | (20, 40, 60)      |          |      | 1632.0      | 1613.2    | 1632.0     |     | TL     | 1    | 300 | 282  |
| 563 | 100   | 120 | 4   | (30, 30, 30, 30)  |          |      | 1660.0      | 1647.2    | 1660.0     |     | TL     | 1    | 300 | 177  |
| 564 | 100   | 120 | 4   | (10, 15, 30, 65)  |          |      | 1651.4      | 1638.4    | 1651.4     |     | TL     | 1    | 300 | 115  |
| 565 | 100   | 120 | 2   | (60, 60)          | 1951.8   |      | 1927.0      | 1902.4    | 1921.3     | 1.3 | TL     | 6    | 300 | 320  |
| 566 | 100   | 120 | 2   | (40, 80)          | 1937.0   |      | 1924.0      | 1897.6    | 1917.9     | 0.7 | TL     | 11   | 300 | 320  |
| 567 | 100   | 120 | 3   | (40, 40, 40)      | * 2025.4 |      | 2025.4      | 2005.1    | 2024.3     | 0.0 | 2206.2 | 3    | 300 | 294  |
| 568 | 100   | 120 | 3   | (20, 40, 60)      |          |      | 1935.3      | 1918.8    | 1935.3     |     | TL     | 1    | 300 | 261  |
| 569 | 100   | 120 | 4   | (30, 30, 30, 30)  | 2133.6   |      | 2129.6      | 2113.1    | 2120.4     | 0.2 | TL     | 6    | 300 | 320  |
| 570 | 100   | 120 | 4   | (10, 15, 30, 65)  |          |      | 2119.5      | 2105.1    | 2119.5     |     | TL     | 1    | 300 | 252  |
| 571 | 100   | 240 | 2   | (120, 120)        |          |      | 1236.7      | 1217.7    | 1236.7     |     | TL     | 1    | 300 | 151  |
| 572 | 100   | 240 | 2   | (80, 160)         |          |      | 1236.0      | 1217.5    | 1236.0     |     | TL     | 1    | 300 | 140  |
| 573 | 100   | 240 | 3   | (80, 80, 80)      |          |      | 1218.5      | 1218.5    | 1218.5     |     | TL     | 1    | 300 | 10   |
| 574 | 100   | 240 | 3   | (40, 80, 120)     |          |      | 1219.3      | 1219.3    | 1219.3     |     | TL     | 1    | 0   | 0    |
| 575 | 100   | 240 | 4   | (60, 60, 60, 60)  |          |      |             |           |            |     | TL     | 0    | 0   | 0    |
| 576 | 100   | 240 | 4   | (20, 30, 60, 130) |          |      |             |           |            |     | TL     | 0    | 0   | 0    |
| 577 | 100   | 240 | 2   | (120, 120)        |          |      | 1375.8      | 1361.0    | 1375.8     |     | TL     | 1    | 300 | 102  |
| 578 | 100   | 240 | 2   | (80, 160)         |          |      | 1376.4      | 1361.0    | 1376.4     |     | TL     | 1    | 300 | 91   |
| 579 | 100   | 240 | 3   | (80, 80, 80)      |          |      | 1362.2      | 1362.2    | 1362.2     |     | TL     | 1    | 0   | 0    |
| 580 | 100   | 240 | 3   | (40, 80, 120)     |          |      | 1366.8      | 1366.8    | 1366.8     |     | TL     | 1    | 0   | 0    |
| 581 | 100   | 240 | 4   | (60, 60, 60, 60)  |          |      |             |           |            |     | TL     | 0    | 0   | 0    |
| 582 | 100   | 240 | 4   | (20, 30, 60, 130) |          |      |             |           |            |     | TL     | 0    | 0   | 0    |

Continued on next page

| No. | $ V $ | $Q$ | $m$ | $\mathbf{Q}$      | opt | $UB$   | $LB_{\text{tree}}$ | $LB_{\text{LP}}$ | $LB_{\text{cut}}$ | gap | time      | #BaB | #CC | #SRI |
|-----|-------|-----|-----|-------------------|-----|--------|--------------------|------------------|-------------------|-----|-----------|------|-----|------|
| 583 | 100   | 240 | 2   | (120, 120)        |     | 1341.9 | 1291.6             | 1256.5           | 1291.6            | 3.8 | <i>TL</i> | 3    | 300 | 320  |
| 584 | 100   | 240 | 2   | (80, 160)         |     |        | 1283.2             | 1256.5           | 1283.2            |     | <i>TL</i> | 1    | 300 | 316  |
| 585 | 100   | 240 | 3   | (80, 80, 80)      |     |        | 1268.3             | 1256.9           | 1268.3            |     | <i>TL</i> | 1    | 300 | 51   |
| 586 | 100   | 240 | 3   | (40, 80, 120)     |     |        | 1265.5             | 1256.9           | 1265.5            |     | <i>TL</i> | 1    | 300 | 30   |
| 587 | 100   | 240 | 4   | (60, 60, 60, 60)  |     |        | 1278.5             | 1278.5           | 1278.5            |     | <i>TL</i> | 1    | 300 | 0    |
| 588 | 100   | 240 | 4   | (20, 30, 60, 130) |     |        |                    |                  |                   |     | <i>TL</i> | 0    | 0   | 0    |
| 589 | 100   | 240 | 2   | (120, 120)        |     |        | 1269.6             | 1253.6           | 1269.6            |     | <i>TL</i> | 1    | 300 | 90   |
| 590 | 100   | 240 | 2   | (80, 160)         |     |        | 1268.6             | 1253.6           | 1268.6            |     | <i>TL</i> | 1    | 300 | 80   |
| 591 | 100   | 240 | 3   | (80, 80, 80)      |     |        | 1257.9             | 1257.9           | 1257.9            |     | <i>TL</i> | 1    | 0   | 0    |
| 592 | 100   | 240 | 3   | (40, 80, 120)     |     |        |                    |                  |                   |     | <i>TL</i> | 0    | 0   | 0    |
| 593 | 100   | 240 | 4   | (60, 60, 60, 60)  |     |        |                    |                  |                   |     | <i>TL</i> | 0    | 0   | 0    |
| 594 | 100   | 240 | 4   | (20, 30, 60, 130) |     |        |                    |                  |                   |     | <i>TL</i> | 0    | 0   | 0    |
| 595 | 100   | 240 | 2   | (120, 120)        |     |        | 1379.7             | 1360.4           | 1379.7            |     | <i>TL</i> | 1    | 300 | 178  |
| 596 | 100   | 240 | 2   | (80, 160)         |     |        | 1380.7             | 1360.4           | 1380.7            |     | <i>TL</i> | 1    | 300 | 186  |
| 597 | 100   | 240 | 3   | (80, 80, 80)      |     |        | 1362.3             | 1362.3           | 1362.3            |     | <i>TL</i> | 1    | 300 | 0    |
| 598 | 100   | 240 | 3   | (40, 80, 120)     |     |        | 1217.4             | 1217.4           | 1217.4            |     | <i>TL</i> | 1    | 0   | 0    |
| 599 | 100   | 240 | 4   | (60, 60, 60, 60)  |     |        | 1373.9             | 1373.9           | 1373.9            |     | <i>TL</i> | 1    | 0   | 0    |
| 600 | 100   | 240 | 4   | (20, 30, 60, 130) |     |        |                    |                  |                   |     | <i>TL</i> | 0    | 0   | 0    |
